# Supplementary material for: Stratification of radiosensitive brain metastases based on an actionable S100A9/RAGE resistance mechanism
Source: PubMed Central journal article supplement (PMC9018424; doi:10.1038/s41591-022-01749-8), 2022-04-11
Supplement: 41591_2022_1749_MOESM1_ESM.pdf [file 41591_2022_1749_MOESM1_ESM.pdf]

---

**Supplementary information**

---

**Stratification of radiosensitive brain metastases based on an actionable S100A9/RAGE resistance mechanism**

---

In the format provided by the authors and unedited

## Supplementary Information

**Title: Stratification of radiosensitive brain metastases based on an actionable S100A9/RAGE resistance mechanism.**

**Author list:**

Cátia Monteiro<sup>1\*\*</sup>, Lauritz Miarka<sup>1\*\*</sup>, María Perea-García<sup>1</sup>, Neibla Priego<sup>1</sup>, Pedro García-Gómez<sup>1</sup>, Laura Álvaro-Espinosa<sup>1</sup>, Ana de Pablos-Aragoneses<sup>1</sup>, Natalia Yebra<sup>1</sup>, Diana Retana<sup>1</sup>, Patricia Baena<sup>1</sup>, Coral Fustero-Torre<sup>2</sup>, Osvaldo Graña-Castro<sup>2</sup>, Kevin Troulé<sup>2</sup>, Eduardo Caleiras<sup>3</sup>, Patricia Tezanos<sup>4</sup>, Pablo Muela<sup>4</sup>, Elisa Cintado<sup>4</sup>, José Luis Trejo<sup>4</sup>, Juan Manuel Sepúlveda<sup>5</sup>, Pedro González-León<sup>6</sup>, Luis Jiménez-Roldán<sup>6,7</sup>, Luis Miguel Moreno<sup>6</sup>, Olga Esteban<sup>6</sup>, Ángel Pérez-Núñez<sup>6,7</sup>, Aurelio Hernández-Lain<sup>8</sup>, José Mazarico Gallego<sup>9</sup>, Irene Ferrer<sup>10,11</sup>, Rocío Suárez<sup>10,11</sup>, Eva M. Garrido-Martín<sup>10,11</sup>, Luis Paz-Ares<sup>9,10,11,12</sup>, Celine Dalmasso<sup>13</sup>, Elizabeth Cohen-Jonathan Moyal<sup>13</sup>, Aurore Siegfried<sup>14</sup>, Aisling Hegarty<sup>15</sup>, Stephen Keelan<sup>15</sup>, Damir Varešlija<sup>15</sup>, Leonie S. Young<sup>15</sup>, Malte Mohme<sup>16</sup>, Yvonne Goy<sup>17</sup>, Harriet Wikman<sup>18</sup>, Jose Fernández-Alén<sup>19</sup>, Guillermo Blasco<sup>19</sup>, Lucía Alcázar<sup>19</sup>, Clara Cabañuz<sup>20</sup>, Sergei I. Grivennikov<sup>21,†</sup>, Andrada Ianus<sup>22</sup>, Noam Shemesh<sup>22</sup>, Claudia C. Faria<sup>23,24</sup>, Rebecca Lee<sup>25,26</sup>, Paul Lorigan<sup>25,26</sup>, Emilie Le Rhun<sup>27</sup>, Michael Weller<sup>27</sup>, Riccardo Soffietti<sup>28</sup>, Luca Bertero<sup>29</sup>, Umberto Ricardi<sup>30</sup>, Joaquim Bosch-Barrera<sup>31,32,33</sup>, Elia Sais<sup>31,32</sup>, Eduard Teixidor<sup>31,32</sup>, Alejandro Hernández-Martínez<sup>31,32</sup>, Alfonso Calvo<sup>11,34</sup>, Javier Aristu<sup>35</sup>, Santiago M. Martín<sup>36</sup>, Alvaro Gonzalez<sup>37</sup>, Omer Adler<sup>38</sup>, Neta Erez<sup>38</sup>, RENACER<sup>39</sup>, Manuel Valiente<sup>1\*</sup>.

**Affiliations:**

<sup>1</sup>Brain Metastasis Group, CNIO; Madrid, 28029, Spain.

<sup>2</sup>Bioinformatics Unit, CNIO; Madrid, 28029, Spain.

<sup>3</sup>Histopathology Core Unit, CNIO; Madrid, 28029, Spain.

<sup>4</sup>Department of Translational Neuroscience, Cajal Institute, CSIC; Madrid, 28002, Spain.

<sup>5</sup>Neuro-Oncology Unit, Hospital Universitario 12 de Octubre; Madrid, 28041, Spain.

<sup>6</sup>Neurosurgery Unit, Hospital Universitario 12 de Octubre; Madrid, 28041, Spain.

<sup>7</sup>Department of Surgery, Universidad Complutense de Madrid, Madrid, 28040; Spain.

<sup>8</sup>Neuropathology Unit, Hospital Universitario 12 de Octubre; Madrid, 28041, Spain.

<sup>9</sup>Medical Oncology, Hospital Universitario 12 de Octubre; Madrid, 28041, Spain.

<sup>10</sup>CNIO-H12O Clinical Cancer Research Unit, Fundación de Investigación Biomédica i+12 and CNIO, Madrid, 28029, Spain.

<sup>11</sup>CIBERONC

<sup>12</sup>Department of Medicine, Universidad Complutense de Madrid, Madrid, 28040, Spain.

<sup>13</sup>Radiation Oncology Department, Institut Claudius Regaud, IUCT-Oncopole; Toulouse, 31100, France.

<sup>14</sup>Anatomopathology Department, CHU Toulouse, IUCT-Oncopole; Toulouse, 31100, France.

<sup>15</sup>Endocrine Oncology Research Group, RCSI University of Medicine and Health Sciences; Dublin, D02 YN77, Ireland.

<sup>16</sup>Department of Neurosurgery, University Medical Center Hamburg-Eppendorf; Hamburg, 20246, Germany.

<sup>17</sup>Department of Radiation Oncology, University Medical Center Hamburg-Eppendorf; Hamburg, 20246, Germany.

<sup>18</sup>Department of Tumor Biology, University Medical Center Hamburg-Eppendorf; Hamburg, 20246, Germany.

<sup>19</sup>Department of Neurosurgery, Hospital Universitario de La Princesa; Madrid, 28006, Spain.

<sup>20</sup>Department of Pathology, Hospital Universitario La Paz; Madrid, 28046, Spain.

<sup>21</sup>Cancer Prevention and Control Program, Fox Chase Cancer Center, 333 Cottman Ave, Philadelphia, PA, 19111, United States of America.

<sup>22</sup>Champalimaud Research, Champalimaud Centre for the Unknown; Lisbon, 1400-038, Portugal.

<sup>23</sup>Instituto de Medicina Molecular João Lobo Antunes, Faculdade de Medicina, Universidade de Lisboa; Lisboa, 1649-028, Portugal.

<sup>24</sup>Department of Neurosurgery, Hospital de Santa Maria, Centro Hospitalar Universitário Lisboa Norte (CHULN); Lisboa, 1649-028, Portugal.

<sup>25</sup>Faculty of Biology Medicine and Health, The University of Manchester; Manchester, M13 9PL, United Kingdom.

<sup>26</sup>The Christie NHS Foundation Trust; Manchester, M20 4BX, United Kingdom.

<sup>27</sup>Department of Neurology, University Hospital Zurich; Zurich, 8091, Switzerland.

<sup>28</sup>Division of Neuro-Oncology, Department of Neuroscience Rita Levi Montalcini, University of Turin; Turin, 10126, Italy.

<sup>29</sup>Department of Medical Sciences, University of Turin; Turin, 10126, Italy.

<sup>30</sup>Department of Oncology, University of Turin; Turin, 10126, Italy.

<sup>31</sup>Department of Medical Oncology, Catalan Institute of Oncology, Doctor Josep Trueta University Hospital; Girona, 17007, Spain.

<sup>32</sup>Girona Biomedical Research Institute (IDIBGi); Salt, 17190, Spain.

<sup>33</sup>Department of Medical Sciences, University of Girona; Girona, 17003, Spain.

<sup>34</sup>IDISNA, Program in Solid Tumors, Center for Applied Medical Research (CIMA), University of Navarra; Pamplona, 31008, Spain.

<sup>35</sup>Department of Oncology, University Clinic of Navarra; Madrid, 28027, Spain.

<sup>36</sup>Department of Oncology, University Clinic of Navarra; Pamplona, 31008, Spain.

<sup>37</sup>Department of Biochemistry, University Clinic of Navarra; Pamplona, 31008, Spain.

<sup>38</sup>Department of Pathology, Sackler Faculty of Medicine, Tel Aviv University; Tel Aviv, 69978, Israel.

<sup>39</sup>Biobank; CNIO; Madrid, 28029; Spain.

\*\*These authors contributed equally to this work.

\*Corresponding author. Email: [mvaliente@cnio.es](mailto:mvaliente@cnio.es).

†Current address: Departments of Medicine and of Biomedical Sciences, Cedars-Sinai Cancer, Cedars-Sinai Medical Center; Los Angeles, CA, 90048, United States of America.

## Supplementary Figures.

### Supplementary Figure 1.

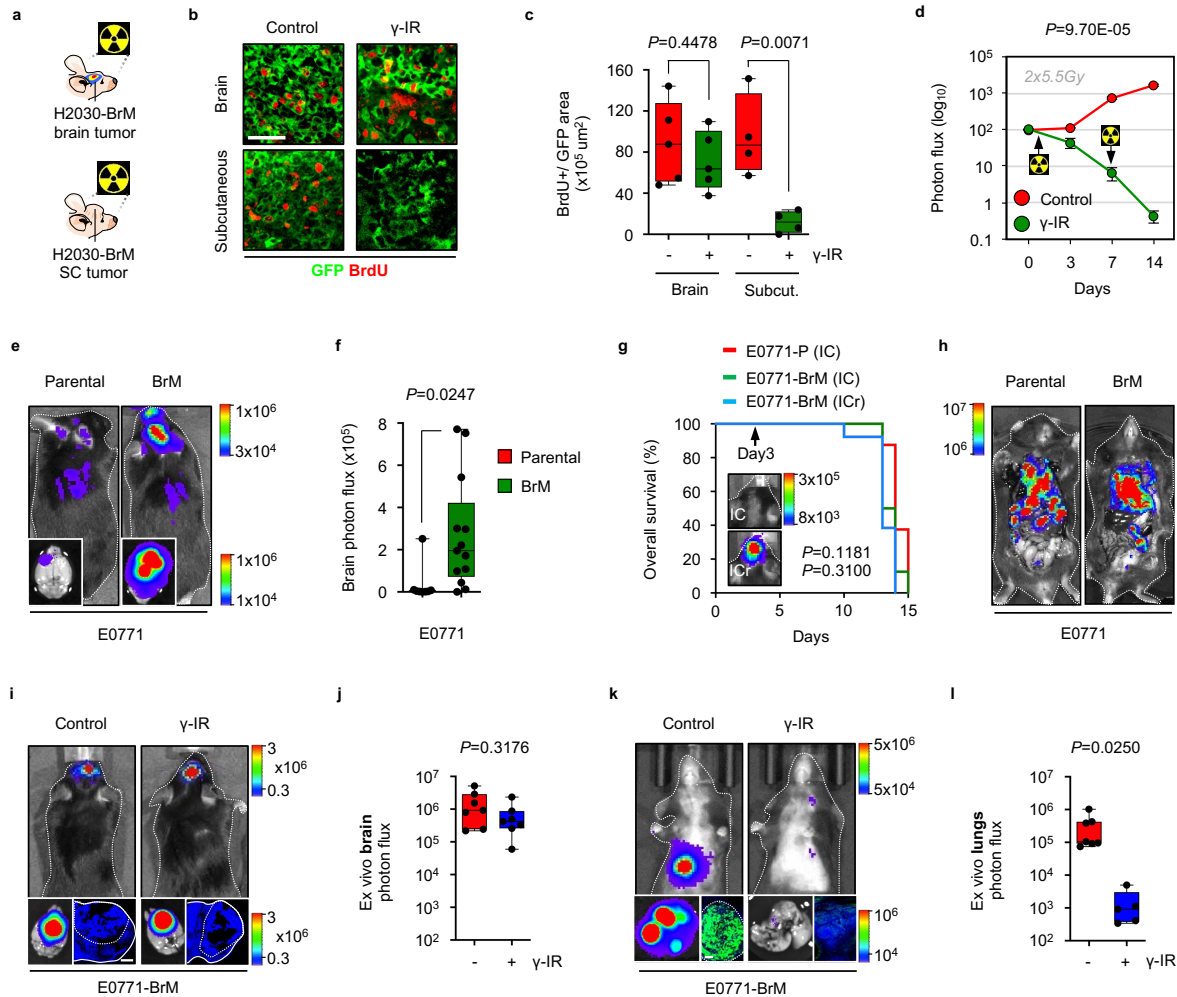

**Acquired radioresistance in experimental brain metastasis.** **a**, Schema of experimental design. **b**, Representative images of H2030-BrM tumors (GFP+) before and after 72 hours after irradiation with a single dose of 10Gy. Scale bar: 50  $\mu\text{m}$ . **c**, Quantification of BrdU+ cancer cells from experiment in **(b)**. Values are shown in box-and-whisker plots where every dot represents an independent brain metastasis or subcutaneous tumor and the line in the box corresponds to the median. The boxes go from the upper to the lower quartiles and the whiskers go from the minimum to the maximum value ( $n=4$ , non-irradiated brain metastases;  $n=4$ , irradiated brain metastases;  $n=4$ , non-irradiated subcutaneous tumors;  $n=4$ , irradiated subcutaneous tumors).  $P$  value is calculated using two-tailed t test. **d**, Quantification of H2030-BrM cells after long-term culture and

fractionated doses of irradiation. A total dose of 11Gy was delivered into two doses of 5.5Gy. Each dot indicates the mean bioluminescence value at each time point normalized for the initial value of the control  $\pm$  sem (n=3 wells per condition). *P* value is calculated using two-tailed t test at the last time point. **e**, Representative images of C57BL/6 mice two weeks after being inoculated with E0771-P or E0771-BrM cells IC. Images in the lower left corner show the BLI of brains *ex vivo*. Dotted line indicates the mouse body. **f**, Quantification of BLI in the head of mice intracardially injected with E0771-P or E0771-BrM cells. Values are shown in box-and-whisker plots where every dot represents a different brain and the line in the box corresponds to the median. The boxes go from the upper to the lower quartiles and the whiskers go from the minimum to the maximum value (n=8 mice, E0771-P; n=13 mice, E0771-BrM). *P* value is calculated using two-tailed t test. **g**, Survival curve comparing E0771-P (n=8) with E0771-BrM (n=8) cell lines inoculated IC and the E0771-BrM inoculated intracranially (Icr) (n=13). *P* value is calculated using log rank (Mantel-Cox) test two-sided (E0771-P versus E0771-BrM from IC injection, *P*=0.1181; E0771-BrM from IC versus E0771-BrM from Icr injection, *P*=0.3100). Representative BLI images of mice inoculated with E0771-BrM IC versus Icr are also shown at 3 days post-inoculation. **h**, Representative images of mice inoculated with E0771-P or E0771-BrM IC showing the extensive burden of extracranial metastases with both cell lines. **i**, Representative images of C57BL/6 mice two weeks after being inoculated with E0771-BrM cells iCr and left untreated or treated with WBRT (10 x 3Gy). Dotted line indicated the body of mice. Additional images show the BLI of brains *ex vivo* as well as the histology where similar tumor masses are detected. Dotted line indicated the metastasis. Scale bar: 10 mm. **j**, Quantification of BLI in the brain *ex vivo*. Values are shown in box-and-whisker plots where every dot represents a different brain and the line in the box corresponds to the median. The boxes go from the upper to the lower quartiles and the whiskers go from the minimum to the maximum value (n=7 mice in each experimental condition). Y-axis is scaled logarithmic. *P* value is calculated using two-tailed t test. **k**, Representative images of C57BL/6 mice 3 weeks after being inoculated with E0771-BrM cells into the lateral tail-vein and left untreated or treated with irradiation to the lung only (10 x 3Gy). Dotted line indicated the body of mice. Additional images show the BLI of lungs *ex vivo* as well as the histology. Dotted line indicated the metastasis. Scale bar: 100  $\mu$ m. **l**, Quantification of bioluminescence of the lungs *ex vivo*. Values are shown in box-and-whisker plots where every dot represents a different lung and the line in the box corresponds to the median. The boxes go from the upper to the lower quartiles

and the whiskers go from minimum to maximum value (n=7, non-irradiated mice; n=5, irradiated mice). Y-axis is scaled logarithmic. *P* value is calculated using Mann-Whitney test, two-sided.



## Supplementary Figure 2.

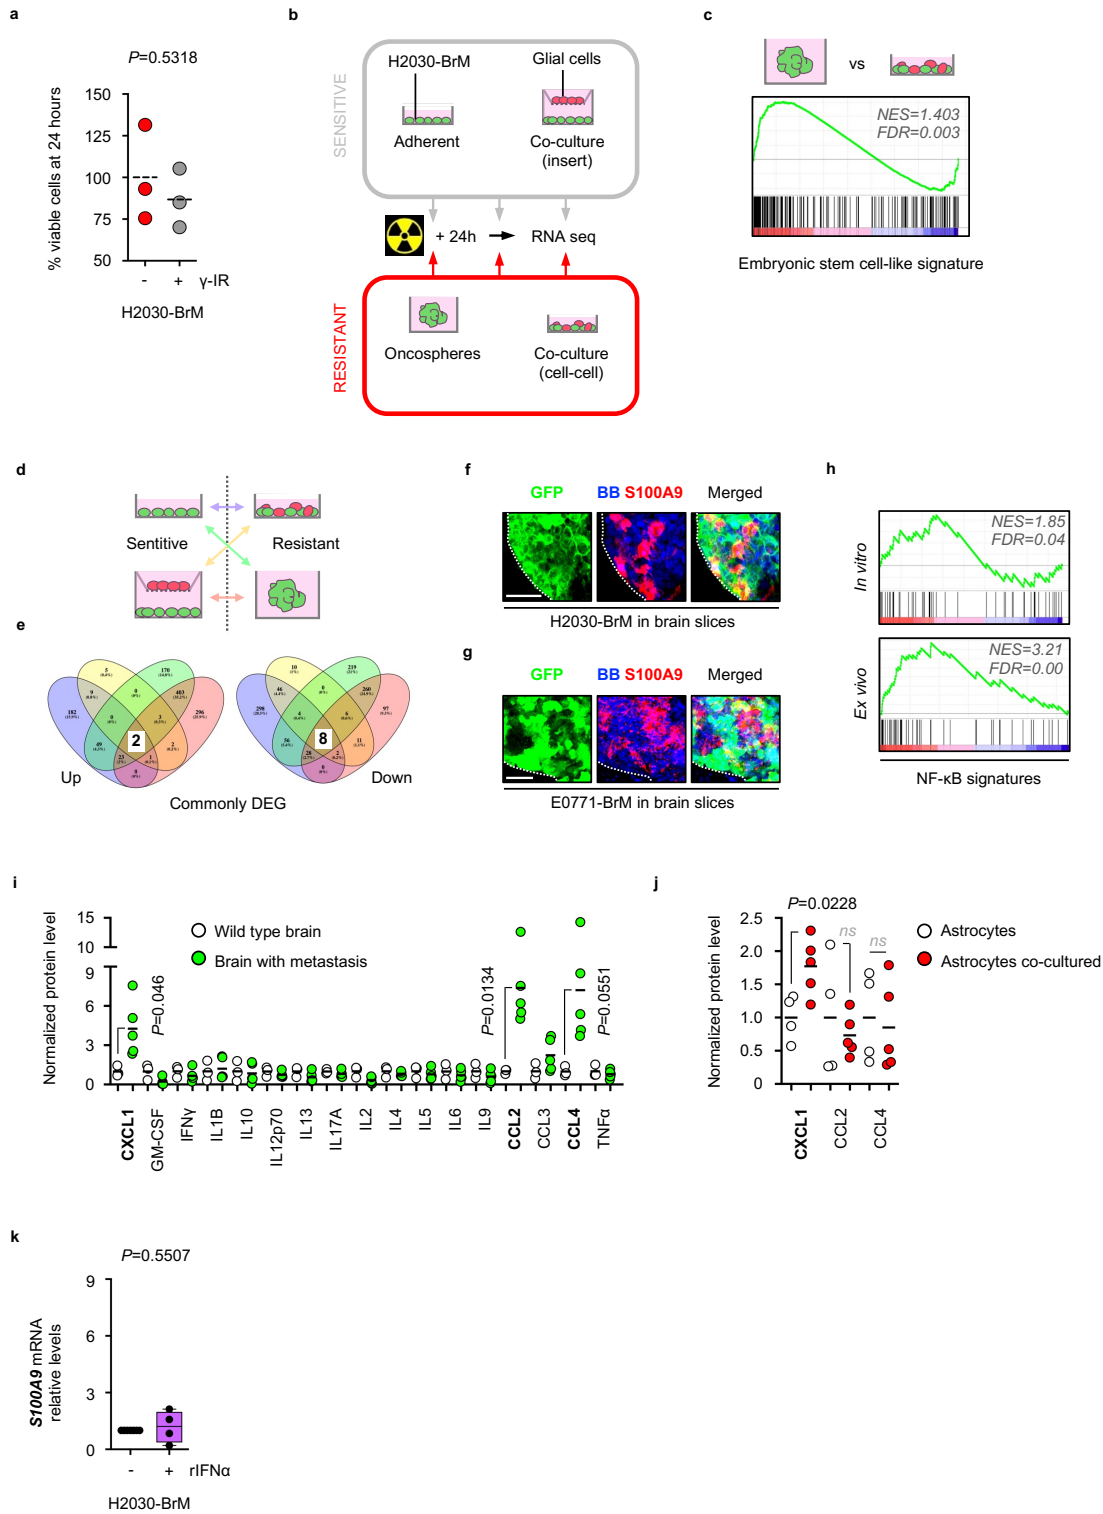

Contact-dependent astrocyte-released cytokines induce S100A9 secretion in cancer cells

**triggering NF- $\kappa$ B activation.** **a**, Quantification of *in vitro* viable cell fraction 24 hours after 10Gy irradiation as determined by manual cell counting of DAPI+ nuclei. Values are percentages of unirradiated controls and shown in a dot plot where each dot represents an independent culture and the line in the box corresponds to the median (each n=3). *P* value was calculated using two-tailed t-test. **b**, Schema of experimental design. **c**, Gene Set Enrichment Analysis (GSEA) was performed on a pre-ranked list of differentially expressed genes between resistant culture preparations including oncospheres and co-cultures. The embryonic stem cell-like signature is significantly enriched in oncospheres (Supplementary Table 2). The green curve corresponds to the Enrichment Score, while the Normalized Enrichment Score (NES) and the False Discovery Rate (FDR) are shown in the graph. **d**, Schema of the different comparisons done with the transcriptomes from resistant and sensitive preparations to identify commonly deregulated genes. **e**, Venn diagram indicating commonly upregulated and downregulated genes in resistant *in vitro* surrogates under the condition shown in **(b)**. Colors in the circles represent the comparison indicated with the arrows in **(d)** with the same color code. **f**, **g**, Representative immunofluorescent images of H2030-BrM and E0771-BrM cells plated on organotypic brain slices *ex vivo*. Scale bars: 50  $\mu$ m. This experiment was repeated three times with similar results. **h**, Representative graphs of positively enriched gene sets depicting induction of NF- $\kappa$ B among a pre-ranked list of differentially expressed genes from resistant culture preparations *in vitro* and *ex vivo* (Supplementary Table 6). The green curve corresponds to the Enrichment Score, while the Normalized Enrichment Score (NES) and the False Discovery Rate (FDR) are shown in each graph. **i**, Quantification of 17 murine cytokines in wild type mice brains and mice brains with H2030-BrM brain metastasis by multiplex cytokine assay. Values indicate cytokine concentration and are shown in a dot plot where each dot represents a brain and the line corresponds to the median (n=3, normal brains; n=5, brain metastasis brains). *P* values are calculated using two-tailed t test. **j**, Quantification of 3 selected murine cytokines in conditioned media (CM) from astrocytes cultured alone and astrocyte-H2030-BrM co-cultures *in vitro* by multiplex cytokine assay. Values indicate relative cytokine concentration to the astrocyte culture alone and are shown in a dot plot where each dot represents an independent experiment and the line corresponds to the median (n=4, CM from astrocytes; n=5, CM from astrocyte-H2030-BrM co-cultures). *P* values are calculated using two-tailed t test. **k**, Quantification of *SI00A9* expression levels in H2030-BrM 3d after a single dose (10Gy) of radiation and treatment with either control or rIFN $\alpha$ . Expression values were normalized to their

respective non-irradiated control for each culture condition. Values are shown as box-and-whisker plots where every dot represents an independent experiment and the line in the box corresponds to the median (n=4, each experimental condition). Whiskers go from minimum to maximum values. *P* value is calculated using two-tailed t test.

### Supplementary Figure 3.

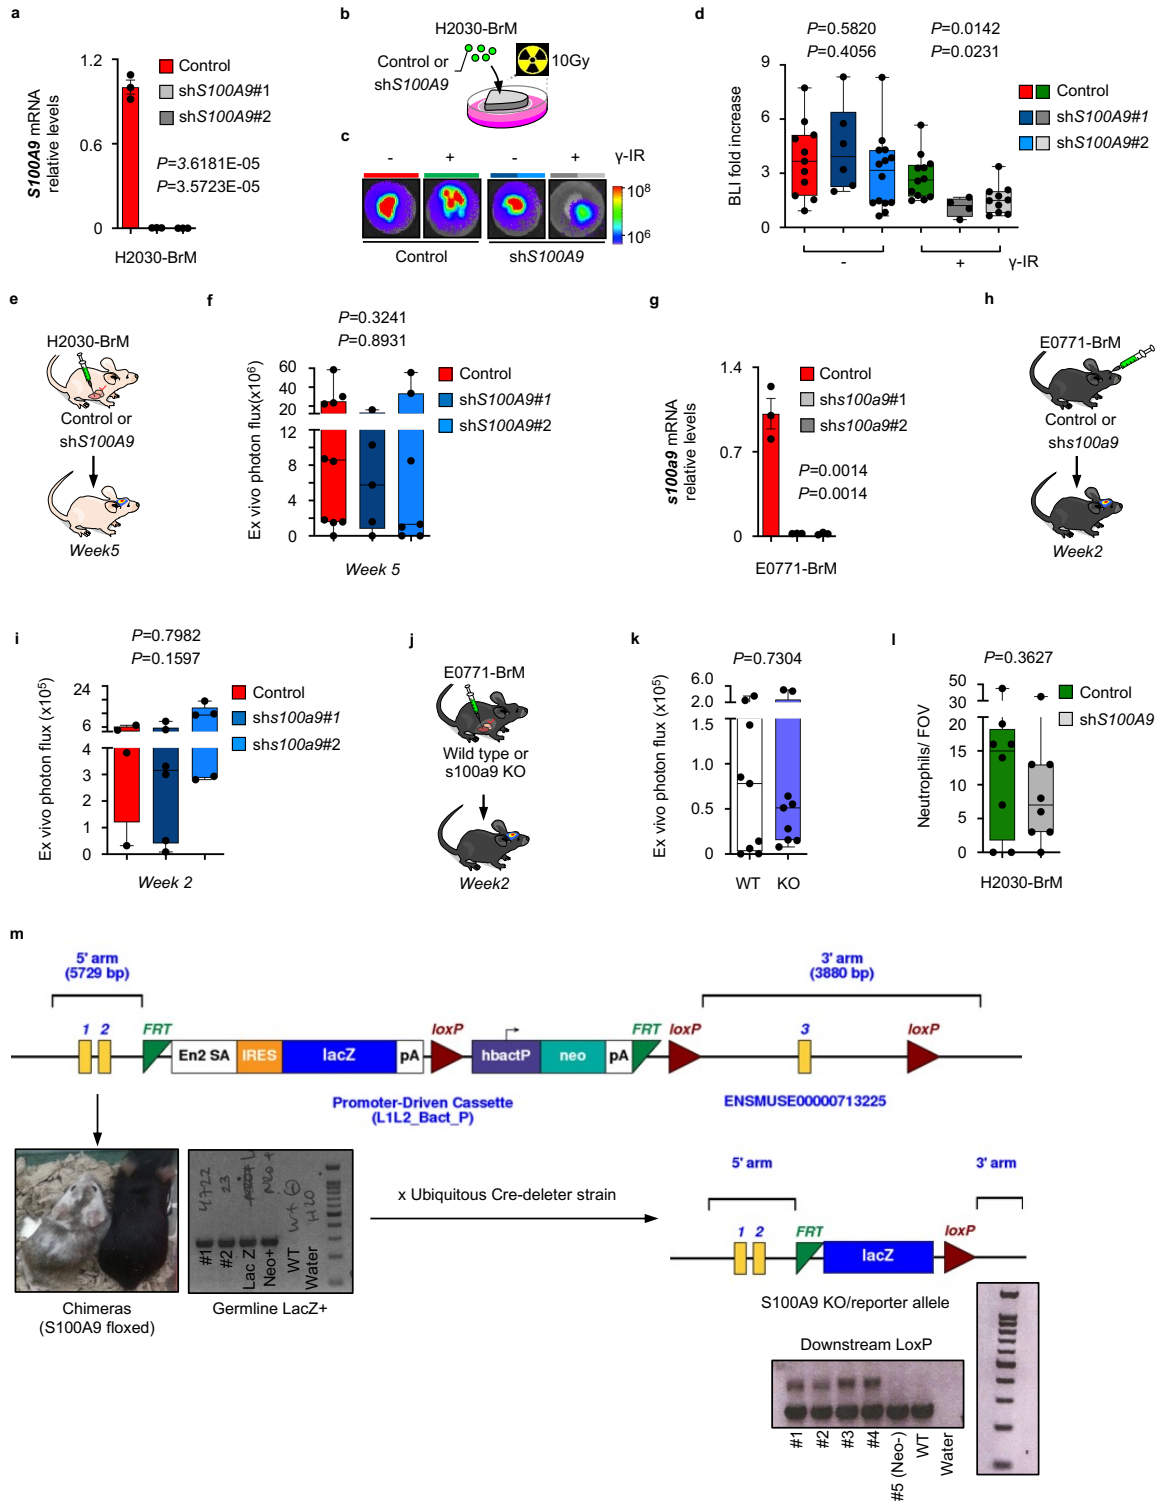

### Targeting S100A9 in cancer cells radiosensitizes experimental lung and breast cancer brain

**metastases in a NF- $\kappa$ B-JunB-dependent manner.** **a** and **g**, Quantification of human *S100A9* (**a**) or mouse *S100a9* (**g**) gene expression by qRT-PCR in H2030-BrM and E0771-BrM cells transduced with a scrambled shRNA as control or two different shRNA against human *S100A9* (sh*S100A9*#1 and sh*S100A9*#2) or mouse *S100a9* (sh*S100a9*#1 and sh*S100a9*#2), respectively. Bars represents the mean  $\pm$  s.e.m where every dot represents an independent culture (n = 3 cultures per experimental condition). P value was calculated using two-tailed t-test. **b**, Schema of experimental design. **c**, Representative bioluminescence images of brain organotypic cultures with metastatic cancer cells, transduced with a shRNA against *S100A9* or a scrambled shRNA as control, 72 hours after irradiation (10Gy, single dose) or no irradiation (0Gy). Color coded lines correlates with the corresponding bars in (**d**). **d**, Quantification of BLI from metastatic cells, transduced with either a scrambled shRNA as control (control), or one of two different shRNAs against *S100A9* (sh*S100A9*#1, sh*S100A9*#2), growing in organotypic brain cultures 72 hours after irradiation (10Gy, single dose) or no irradiation. Values were normalized to their respective non-irradiated controls and are shown in box-and-whisker plots where every dot represents an independent culture and the line in the box corresponds to the median. The boxes go from the upper to the lower quartiles and the whiskers go from the minimum to the maximum value (n=11, non-irradiated brain slices with H2030-BrM control; n=6, non-irradiated brain slices with H2030-BrM sh*S100A9*#1; n=14, non-irradiated brain slices with H2030-BrM sh*S100A9*#2; n=12, irradiated brain slices with H2030-BrM control; n=4, irradiated brain slices with H2030-BrM sh*S100A9*#1; n=10, irradiated brain slices with H2030-BrM sh*S100A9*#2). P value is calculated using two-tailed t test. **e** and **h**, Schema of experimental design. **f** and **i**, Quantification of the bioluminescence at the endpoint of the experiments depicted in (**e**, **h**) comparing brains from non-irradiated mice injected with H2030-BrM (**f**) or E0771-BrM (**i**) transduced with corresponding shRNA. Values are shown in box-and-whisker plots where every dot represents a different brain and the line in the box corresponds to the median. The boxes go from the upper to the lower quartiles and the whiskers go from the minimum to the maximum value (n=10, H2030-BrM control; n=5, H2030-BrM sh*S100A9*#1; n=7, H2030-BrM sh*S100A9*#2; n=4, E0771-BrM control; n=6, E0771-BrM sh*S100a9*#1; n=5, E0771-BrM sh*S100a9*#2). P value is calculated using two-tailed t test. **j**, Schema of experimental design. **k**, Quantification of the *ex vivo* photon flux at the endpoint of the experiment depicted in (**j**) comparing brains from *S100A9*<sup>+/+</sup> and *S100A9*<sup>-/-</sup> mice injected intracardially with E0771-BrM. Values are shown in box-and-whisker plots where every

dot represents a different brain and the line in the box corresponds to the median (n=9, S100A9<sup>+/+</sup> mice; n=9, S100A9<sup>-/-</sup> mice). The boxes go from the upper to the lower quartiles and the whiskers go from the minimum to the maximum value. *P* value was calculated using Mann-Whitney test, two-sided. **I**, Quantification of the numbers of neutrophils per FOV in brain metastasis from H2030-BrM control or sh*S100A9*, using the NIMP-R14 staining. For both conditions equal numbers of lesions of different sizes were chosen. Values are shown in box-and-whisker plots where every dot represents a metastatic lesion and the line in the box corresponds to the median. The boxes go from the upper to the lower quartiles and the whiskers go from minimum to maximum value (n=8 FOV from 2 brains, H2030-BrM control; n=8 FOV from three brains, H2030-BrM sh*S100A9*). *P* value was calculated using two-tailed t test.

## Supplementary Figure 4.

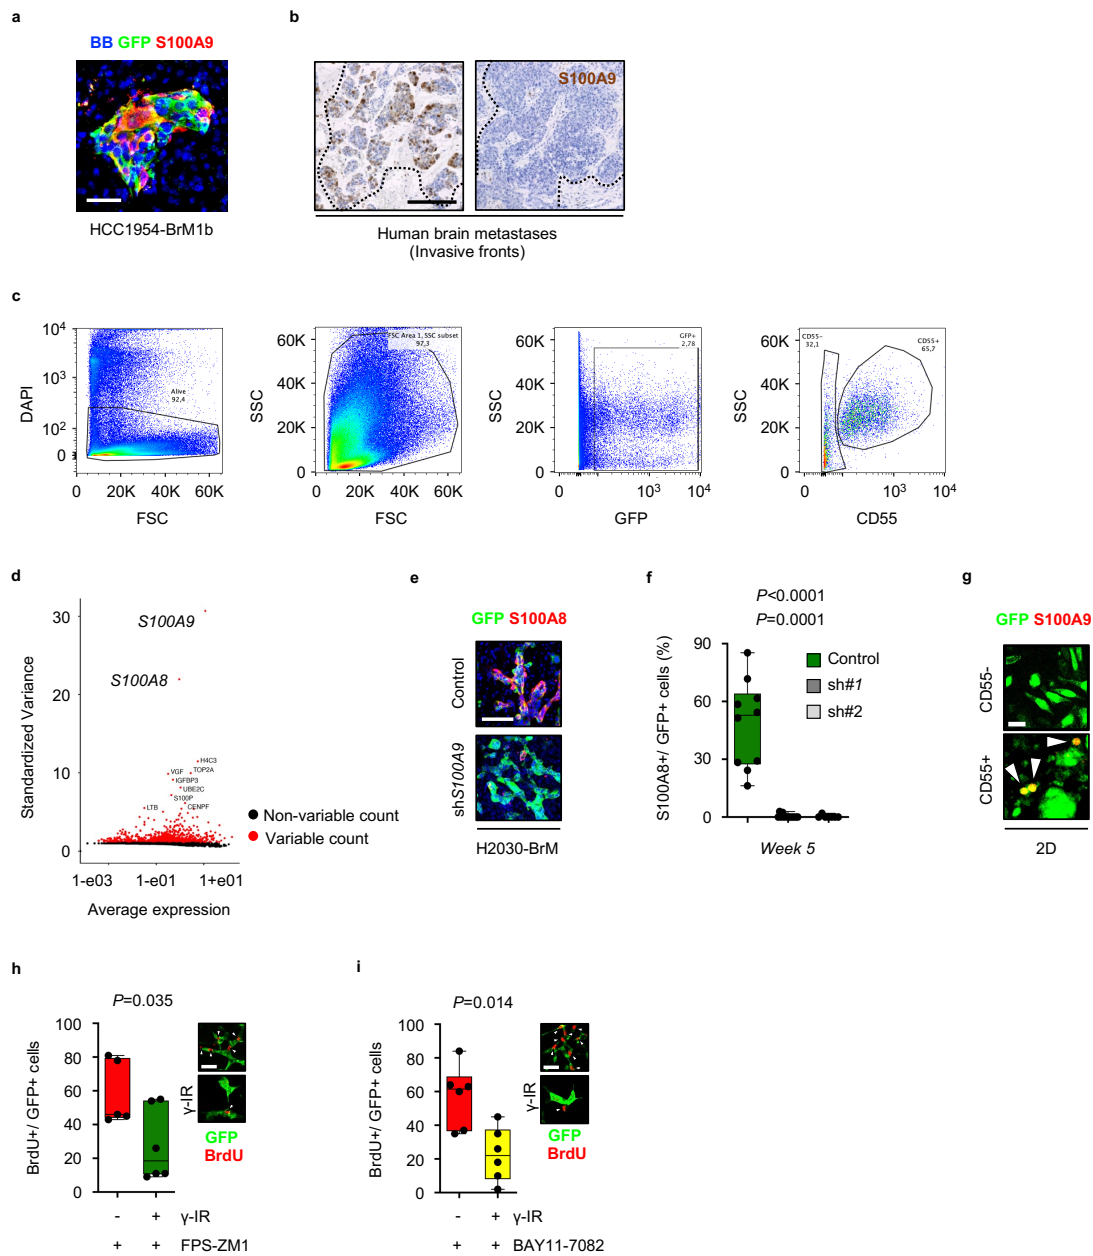

**S100A9-mediated radioresistance is linked to cancer stem cell properties and sensitivity to RAGE and NF- $\kappa$ B inhibition.** **a**, Representative image of a brain metastasis generated by HCC1954-BrM1b. Scale bar: 50  $\mu$ m. This experiment was repeated three times with similar results. **b**, Representative images of invasive fronts from human brain metastases (dotted lines). Scale bar: 200  $\mu$ m. This experiment was performed once using the available samples with invasive fronts. **c**,

Gating strategy for fluorescence activated cell sorting (FACS) of CD55- and CD55+ cells from H2030-BrM brain metastases. **d**, Graph shows a subset of genes that exhibit high cell-to-cell variation in the dataset

obtained after modelling the mean-variance relationship inherent in single-cell data with Seurat<sup>21</sup>. **e**, Representative images of H2030-BrM Control and sh*S100A9* brain metastases. Scale bar: 100  $\mu$ m. **f**, Quantification of the percentage of S100A8+ GFP+ positive cells in irradiated brain metastatic lesions *in vivo*, generated from intracardiac injection of H2030-BrM Control, H2030-BrM sh*S100A9#1* or H2030-BrM sh*S100A9#2* cells. Values are shown in box-and-whisker plots where every dot represents a metastatic lesion and the line in the box corresponds to the median. The boxes go from the upper to the lower quartiles and the whiskers go from the minimum to the maximum value (n=10 FOV, 2 brains, H2030-BrM Control +  $\gamma$ -IR; n=14 FOV, 3 brains, H2030-BrM sh*S100A9#1* +  $\gamma$ -IR; n=7 FOV, 2 brains, H2030-BrM sh*S100A9#2* +  $\gamma$ -IR). *P* value was calculated using two-tailed Mann-Whitney Test. **g**, Representative immunofluorescent images of sorted CD55- and CD55+ cells grown *in vitro*. Scale bar: 25  $\mu$ m. This experiment was performed three times with similar results. **h**, Representative images and quantification of the mean percentage of BrdU+ cells per GFP+ cells in brain organotypic cultures with H2030-BrM after treatment with 10  $\mu$ M of FPS-ZM1 and 10Gy irradiation or no irradiation. Values are shown in box-and-whisker plots where every dot represents an independent culture and the line in the box corresponds to the median. The boxes go from the upper to the lower quartiles and the whiskers go from the minimum to the maximum value (n=5, non-irradiated H2030-BrM; n=6 irradiated H2030-BrM, both treated with FPS-ZM1). *P* value is calculated using two-tailed t test. Scale bar: 50  $\mu$ m. **i**, Representative images and quantification of the mean percentage of BrdU+ cells per GFP+ cells in brain organotypic cultures with H2030-BrM after treatment with 50  $\mu$ M of BAY-117081 and 10Gy irradiation or no irradiation. Values are shown in box-and-whisker plots where every dot represents an independent culture and the line in the box corresponds to the median. The boxes go from the upper to the lower quartiles and the whiskers go from the minimum to the maximum value (n=6, non-irradiated H2030-BrM; n=6, irradiated H2030-BrM, both treated with BAY-117081). *P* value is calculated using two-tailed t test. Scale bar: 50  $\mu$ m.



# Supplementary Figure 5.

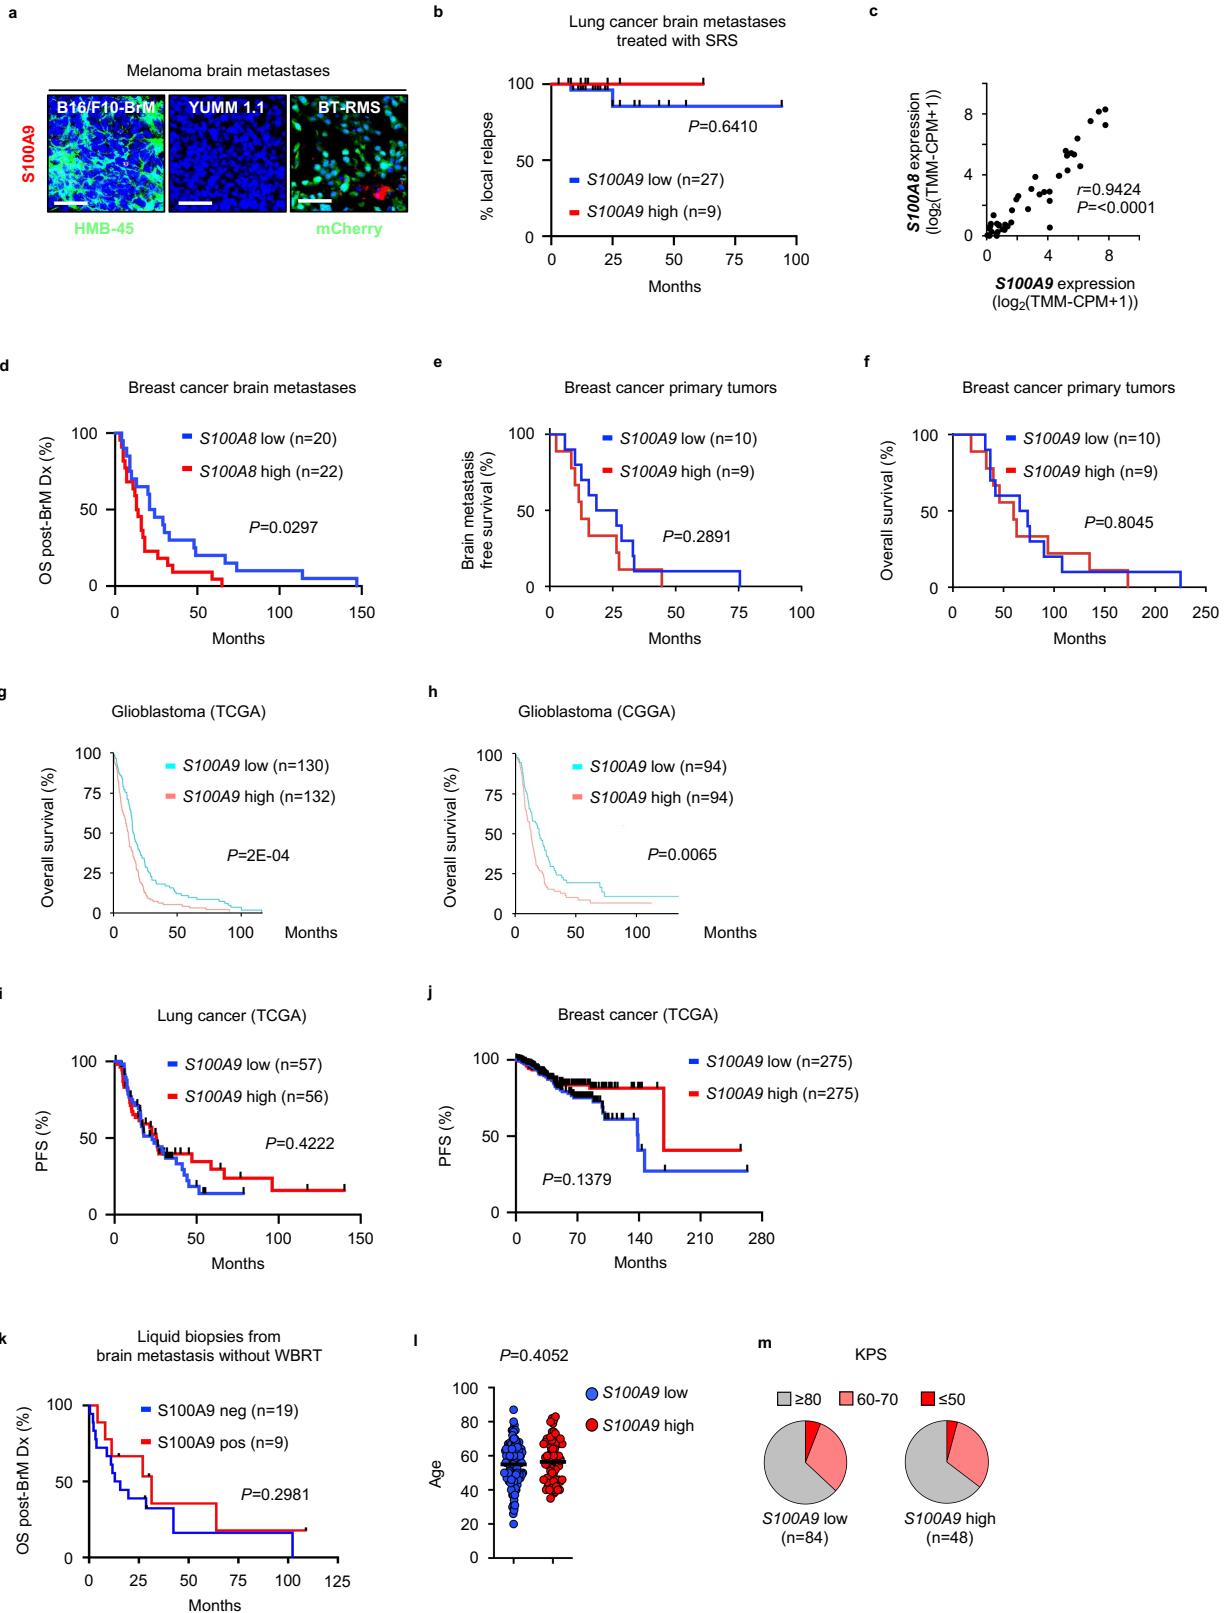

**S100A9 is a brain metastasis biomarker of therapeutic response to WBRT.** **a**, Representative images of immunofluorescent staining for S100A9 in brain metastases from three different murine brain metastatic melanoma models (B16/F10-BrM, YUMM1.1, BT-RMS). Scale bars: 50  $\mu$ m. The experiment was performed three times for each model with similar results. **b**, Analysis of time to relapse in a cohort of 36 lung cancer brain metastasis patients treated with stereotactic radiosurgery (SRS). Data is shown as a Kaplan-Meier plot and two groups of patients (S100A9 low/high) were delineated by using 5% of S100A9 immunohistochemical staining positivity as a cut-off. *P* value was calculated using log rank (Mantel-Cox) test. **c**, Correlation of *S100A9* and *S100A8* gene expression in each respective patient from a cohort of 42 breast cancer brain metastases. Pearson R correlation coefficient and corresponding *P* value were calculated. **d**, Analysis of survival post-brain metastasis diagnosis in a cohort of 42 breast cancer brain metastasis patients. Only patients that received radiotherapy were included. Data is shown as a Kaplan-Meier plot and two groups of patients (S100A8 low/high) were delineated according to their *S100A8* mRNA expression levels in brain metastasis. *P* value was calculated using log rank (Mantel-Cox) test. **e**, Analysis of brain metastasis-free survival from primary tumor diagnosis in a previously published cohort of 19 breast cancer brain metastasis patients. Data is shown as a Kaplan-Meier plot and two groups of patients (S100A9 low/high) were delineated according to their *S100A9* mRNA expression levels in brain metastasis by using the median of *S100A9* expression as a cut-off. *P* value was calculated using log rank (Mantel-Cox) test. **f**, Analysis of overall survival post-primary tumor diagnosis in a previously published cohort of 19 breast cancer brain metastasis patients. Data is shown as a Kaplan-Meier plot and two groups of patients (S100A9 low/high) were delineated according to their *S100A9* mRNA expression levels in brain metastasis by using the median of *S100A9* expression as a cut-off. *P* value was calculated using log rank (Mantel-Cox) test. **g, h**, Analysis of overall survival post-primary tumor diagnosis in the glioblastoma TCGA (**g**) and CGGA (**h**) cohorts treated with the standard-of-care, which includes neurosurgery, radiotherapy and temozolomide <sup>42</sup>. Data is shown as a Kaplan-Meier plot and two groups of patients (S100A9 low/high) were delineated according to their *S100A9* mRNA expression levels in brain metastasis by using the 1<sup>st</sup> and 4<sup>th</sup> quartile of *S100A9* expression as a cut-off. *P* value was calculated using log rank (Mantel-Cox) test. **i, j**, Analysis of progression-free survival in the TCGA lung cancer (**i**) and breast cancer (**j**) cohort. Only patients that were treated with radiotherapy were included. Data is shown as Kaplan-Meier plots and two groups of patients (S100A9 low/high) were

delineated according to their S100A9 mRNA expression levels in primary lung and breast tumors using the respective median expression as cut-off. *P* value was calculated using log rank (Mantel-Cox) test. **k**, Analysis of survival post-brain metastasis diagnosis in a combined cohort of lung cancer brain metastasis patients (3 cases) and breast cancer brain metastasis patients (25 cases) that did not receive WBRT. Data is shown as a Kaplan-Meier plot and two groups of patients (S100A9 negative/positive) were delineated by their S100A9 positivity in serum samples. *P* value was calculated using log rank (Mantel-Cox) test. **l**, Analysis of patient age at neurosurgery/WBRT of 73 S100A9 high and 128 S100A9 low patients from all cohorts of brain metastasis patients used in this study where age was available (Supplementary Tables 13, 15, 16, 17 and 21). Values are shown in dot plots where each dot represents a patient and the line corresponds to the median. *P* value was calculated using two-tailed t-test. **m**, Analysis of KPS score at neurosurgery/WBRT of S100A9 48 high and 84 S100A9 low patients from all cohorts of brain metastasis patients used in this study where KPS was available (Supplementary Tables 13, 15, 17 and 21). Values are shown in pie charts representing percentages of each respective KPS score in either S100A9 high or low patients. For S100A9 high, 2 patients had a KPS score <50, 15 patients had a score 60-70 and 31 patients had a score >80. For S100A9 low patients, 5 patients had a KPS score <50, 26 patients had a score of 60-70 and 51 patients had a score >80.

# Supplementary Figure 6.

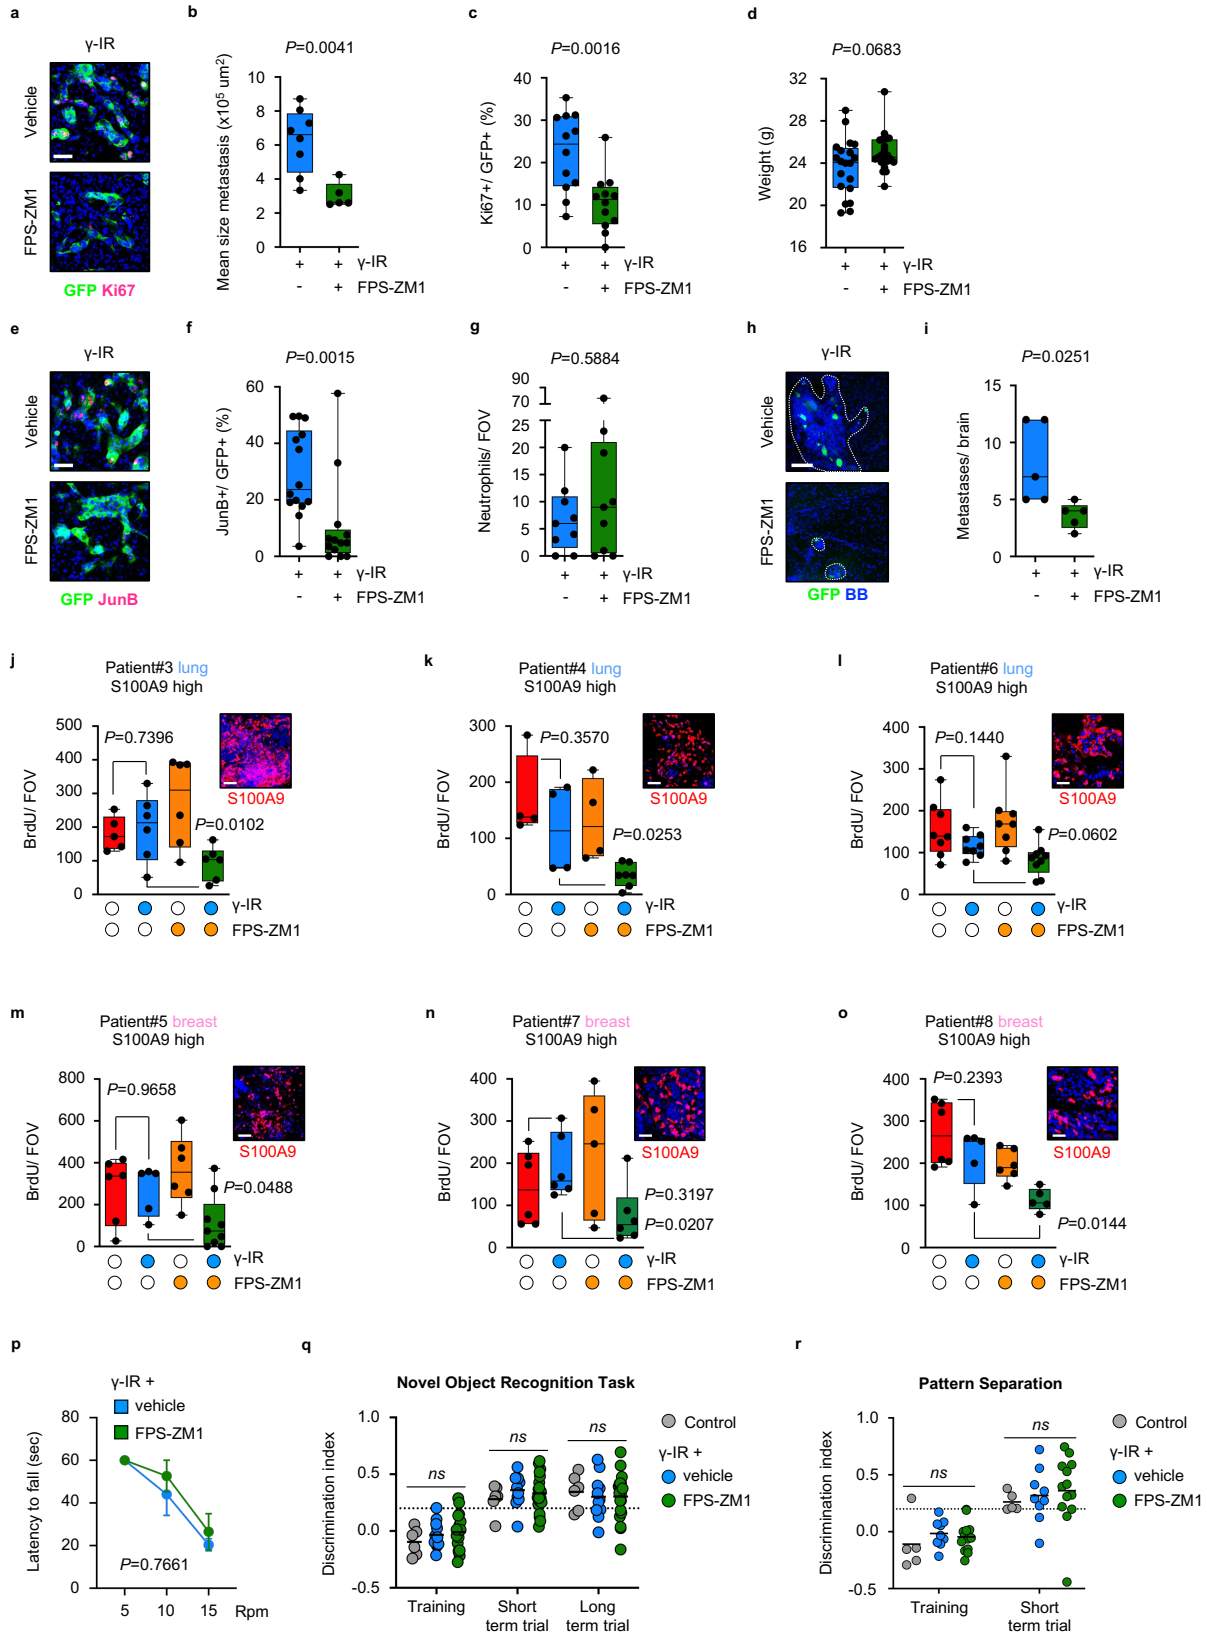

**FPS-ZM1 radiosensitizes experimental and human brain metastases.** **a**, Representative images of brain metastases at the experimental endpoint as described in (Fig. 6a). Scale bar: 50  $\mu\text{m}$ . **b**, Quantification of H2030-BrM metastasis mean size in mice treated with WBRT and vehicle or FPS-ZM1 as indicated in (Fig.6a). Values are shown in box-and-whisker plots where every dot represents a brain and the line in the box corresponds to the median. The boxes go from the upper to the lower quartiles and the whiskers go from the minimum to the maximum value (n=8, Vehicle +  $\gamma$ -IR; n=5, FPS-ZM1 +  $\gamma$ -IR). *P* value was calculated using two-tailed t-test. **c**, Quantification of proliferation using Ki67 in H2030-BrM metastases from mice treated with WBRT and vehicle or FPS-ZM1 as indicated in (Fig. 6a). Values are shown in box-and-whisker plots where every dot represents a metastatic lesion obtained from 4 brains in each experimental condition and the line in the box corresponds to the median. The boxes go from the upper to the lower quartiles and the whiskers go from the minimum to the maximum value (n=12, Vehicle +  $\gamma$ -IR; n=12, FPS-ZM1 +  $\gamma$ -IR). *P* value was calculated using two-tailed t-test. **d**, Quantification of mouse weight at the end of the experiment as indicated in (Fig. 6a) comparing mice treated with WBRT and vehicle or FPS-ZM1. Values are shown in box-and-whisker plots where every dot represents a mouse and the line in the box corresponds to the median. The boxes go from the upper to the lower quartiles and the whiskers go from the minimum to the maximum value (n=20, Vehicle +  $\gamma$ -IR; n=21, FPS-ZM1 +  $\gamma$ -IR). *P* value was calculated using two-tailed t-test. **e**, Representative images of brain metastases at the experimental endpoint as described in (Fig. 6a) stained for JunB. Scale bar: 50  $\mu\text{m}$ . **f**, Quantification of JunB+ GFP+ H2030-BrM cells in mice treated with WBRT and vehicle or FPS-ZM1 as indicated in (Fig. 6a). Values are shown in box-and-whisker plots where every dot represents a metastatic lesion obtained from 4 brains in each experimental condition and the line in the box corresponds to the median. The boxes go from the upper to the lower quartiles and the whiskers go from the minimum to the maximum value (n=14 metastases from 4 mice, Vehicle +  $\gamma$ -IR; n=13 metastases from 4 mice, FPS-ZM1 +  $\gamma$ -IR). *P* value was calculated using two-tailed Mann-Whitney Test. **g**, Quantification of neutrophils per FOV in H2030-BrM brain metastasis from mice treated with either WBRT and vehicle or FPS-ZM1, using the NIMP-R14 staining. For both conditions equal numbers of lesions of different sizes were chosen. Values are shown in box-and-whisker plots where every dot represents a metastatic lesion and the line in the box corresponds to the median. The boxes go from the upper to the lower quartiles and the whiskers go from minimum to maximum value (n=9 FOV, each experimental condition). *P* value was

calculated using two-tailed t test. **h**, Representative images of brain metastases at the experimental endpoint as described in (Extended Data Fig. 5a). Scale bar: 75  $\mu\text{m}$ . **i**, Quantification of E0771-BrM metastases in mice treated with WBRT and vehicle or FPS-ZM1 as indicated in (Extended Data Fig. 5a). Values are shown in box-and-whisker plots where every dot represents a mouse and the line in the box corresponds to the median. The boxes go from the upper to the lower quartiles and the whiskers go from the minimum to the maximum value ( $n=5$ , Vehicle +  $\gamma$ -IR;  $n=5$ , FPS-ZM1 +  $\gamma$ -IR).  $P$  value was calculated using two-tailed t-test. **j-o**, Quantification of BrdU+ cancer cells in PDOC treated with FPS-ZM1 and/or  $\gamma$ -IR obtained from patient#3 (**j**), patient#4 (**k**), patient#5 (**m**), patient#6 (**l**), patient#7 (**n**) and patient#8 (**o**). Values are shown in box-and-whisker plots where every dot represents a FOV (4-9 FOV per experimental condition obtained from 4-6 organotypic cultures) and the line in the box corresponds to the median. The boxes go from the upper to the lower quartiles and the whiskers go from the minimum to the maximum value.  $P$  value was calculated using two-tailed t-test. A representative image in each PDOC show S100A9 levels. Scale bar: 50  $\mu\text{m}$ . **p**, Quantification of latency to fall at three different constant speeds of mice treated with WBRT and either vehicle or FPS-ZM1. Values shown are mean  $\pm$  SEM ( $n=5$  mice, each experimental condition).  $P$  value was calculated using two-tailed t-test. **q**, Quantification of discrimination index comparing different groups when trained and when short term and long-term memories were evaluated. Values are shown in a scatter dot plot where every dot represents a mouse and the line corresponds to the mean ( $n=6$ , Control;  $n=13$ , Vehicle +  $\gamma$ -IR,  $n=20$ , FPS-ZM1 +  $\gamma$ -IR). Calculation of  $P$  values are detailed in Supplementary Table 24. **r**, Quantification of discrimination index comparing different groups when trained and when short term memory was evaluated. Values are shown in a scatter dot plot where every dot represents a mouse and the line corresponds to the mean ( $n=6$ , Control;  $n=13$ , Vehicle +  $\gamma$ -IR,  $n=20$ , FPS-ZM1 +  $\gamma$ -IR). Calculation of  $P$  values are detailed in Supplementary Table 24.

**Supplementary Tables.**





upregulation of the gene set signature WONG\_Adult\_Tissue\_Stem\_Module. The table shows the upregulated genes belonging to the signature.

## Supplementary Table 2.

Supplementary Table 2\_Enrichment of a stem cell signature in H2030-BrM oncospheres\_Corresponds to Fig.S2C

Ben Porath et al., PMID: 18443585 .Geneset E5exp1 (SuppTable1)  
Oncospheres vs co-culture with cell-cell contact

| NAME   | PROBE   | GENE SYMBOL | GENE_TITLE | RANK IN GENE LIST | RANK METRIC SCORE | RUNNING ES  | CORE ENRICHMENT |
|--------|---------|-------------|------------|-------------------|-------------------|-------------|-----------------|
| row_0  | TEAD4   | null        | null       | 130               | 1.024573684       | 0.010472498 | Yes             |
| row_1  | FGF2    | null        | null       | 132               | 1.021217823       | 0.026898688 | Yes             |
| row_2  | SFRP1   | null        | null       | 153               | 0.930548549       | 0.040977463 | Yes             |
| row_3  | SYNGR3  | null        | null       | 172               | 0.893029034       | 0.054544177 | Yes             |
| row_4  | AP1M2   | null        | null       | 199               | 0.833103299       | 0.06677168  | Yes             |
| row_5  | MCM3    | null        | null       | 253               | 0.750710666       | 0.07641269  | Yes             |
| row_6  | CBS     | null        | null       | 291               | 0.70774138        | 0.08610575  | Yes             |
| row_7  | SLC29A1 | null        | null       | 332               | 0.676245689       | 0.095151044 | Yes             |
| row_8  | PRIM1   | null        | null       | 402               | 0.621987522       | 0.10197053  | Yes             |
| row_9  | DIAPH2  | null        | null       | 403               | 0.621907115       | 0.11200221  | Yes             |
| row_10 | MCM5    | null        | null       | 406               | 0.621322095       | 0.12193131  | Yes             |
| row_11 | CDC6    | null        | null       | 443               | 0.602487028       | 0.12997313  | Yes             |
| row_12 | MCM4    | null        | null       | 475               | 0.586127758       | 0.13798392  | Yes             |
| row_13 | DHFR    | null        | null       | 494               | 0.577404022       | 0.14645945  | Yes             |
| row_14 | CDT1    | null        | null       | 543               | 0.557014167       | 0.1532089   | Yes             |
| row_15 | CDC25A  | null        | null       | 554               | 0.551998436       | 0.16164719  | Yes             |
| row_16 | GAD1    | null        | null       | 600               | 0.534975529       | 0.16818087  | Yes             |
| row_17 | MTHFD1  | null        | null       | 602               | 0.534266949       | 0.17675228  | Yes             |
| row_18 | CDC20   | null        | null       | 613               | 0.530476332       | 0.18484342  | Yes             |
| row_19 | RRAS2   | null        | null       | 626               | 0.524727225       | 0.19274867  | Yes             |
| row_20 | RRM2    | null        | null       | 628               | 0.523922205       | 0.20115323  | Yes             |
| row_21 | CHAF1A  | null        | null       | 635               | 0.522079408       | 0.2092952   | Yes             |
| row_22 | DEK     | null        | null       | 660               | 0.512214065       | 0.21643974  | Yes             |
| row_23 | MRE11A  | null        | null       | 661               | 0.512183785       | 0.22470152  | Yes             |
| row_24 | NOLC1   | null        | null       | 666               | 0.509434938       | 0.23273268  | Yes             |
| row_25 | PNN     | null        | null       | 710               | 0.496344447       | 0.23873636  | Yes             |
| row_26 | MCM2    | null        | null       | 720               | 0.492111713       | 0.24625522  | Yes             |
| row_27 | RFC4    | null        | null       | 732               | 0.486566156       | 0.25359148  | Yes             |
| row_28 | UNG     | null        | null       | 737               | 0.483106762       | 0.26119795  | Yes             |
| row_29 | BOP1    | null        | null       | 759               | 0.477881789       | 0.26792842  | Yes             |
| row_30 | PUS1    | null        | null       | 797               | 0.467119783       | 0.2737401   | Yes             |
| row_31 | RFC3    | null        | null       | 801               | 0.466049492       | 0.28111804  | Yes             |
| row_32 | MCM6    | null        | null       | 814               | 0.461074591       | 0.28799653  | Yes             |
| row_33 | NUDT1   | null        | null       | 877               | 0.444472969       | 0.29227862  | Yes             |
| row_34 | FEN1    | null        | null       | 1022              | 0.41176331        | 0.29221416  | Yes             |
| row_35 | ABCE1   | null        | null       | 1045              | 0.408603996       | 0.29778057  | Yes             |
| row_36 | HSPD1   | null        | null       | 1076              | 0.403448015       | 0.30289122  | Yes             |
| row_37 | ADD2    | null        | null       | 1077              | 0.403116792       | 0.3093937   | Yes             |
| row_38 | RBBP8   | null        | null       | 1140              | 0.38980034        | 0.31279388  | Yes             |
| row_39 | TFAM    | null        | null       | 1242              | 0.373224348       | 0.3141104   | Yes             |
| row_40 | PFAS    | null        | null       | 1268              | 0.369595081       | 0.31890783  | Yes             |
| row_41 | GART    | null        | null       | 1276              | 0.3679488         | 0.32451704  | Yes             |
| row_42 | MSH6    | null        | null       | 1335              | 0.360455245       | 0.32763016  | Yes             |
| row_43 | MCM7    | null        | null       | 1336              | 0.359998835       | 0.33343714  | Yes             |
| row_44 | ILF3    | null        | null       | 1379              | 0.353750765       | 0.3371873   | Yes             |
| row_45 | SMS     | null        | null       | 1380              | 0.353628218       | 0.34289148  | Yes             |
| row_46 | DDX18   | null        | null       | 1469              | 0.341342807       | 0.34429917  | Yes             |
| row_47 | NUP107  | null        | null       | 1549              | 0.3309187         | 0.34595785  | Yes             |
| row_48 | CSE1L   | null        | null       | 1550              | 0.330876529       | 0.35129505  | Yes             |
| row_49 | CCNA2   | null        | null       | 1562              | 0.329280615       | 0.3560942   | Yes             |
| row_50 | DDX21   | null        | null       | 1569              | 0.329038084       | 0.36112234  | Yes             |
| row_51 | ITPR3   | null        | null       | 1597              | 0.325574607       | 0.36511657  | Yes             |
| row_52 | MICB    | null        | null       | 1630              | 0.321142226       | 0.36880645  | Yes             |
| row_53 | MSH2    | null        | null       | 1637              | 0.319912225       | 0.37368736  | Yes             |
| row_54 | HSPA8   | null        | null       | 1798              | 0.303086221       | 0.3711247   | Yes             |
| row_55 | NTHL1   | null        | null       | 1917              | 0.287750632       | 0.37027076  | Yes             |
| row_56 | PSIP1   | null        | null       | 1961              | 0.283292502       | 0.3728378   | Yes             |
| row_57 | PODXL   | null        | null       | 1971              | 0.28224498        | 0.37697142  | Yes             |
| row_58 | BUB1    | null        | null       | 2001              | 0.280100077       | 0.38013896  | Yes             |
| row_59 | PRMT3   | null        | null       | 2089              | 0.271447152       | 0.38046578  | Yes             |
| row_60 | MTHFD2  | null        | null       | 2149              | 0.266052991       | 0.38200957  | Yes             |
| row_61 | PRPS1   | null        | null       | 2209              | 0.261414319       | 0.38347855  | Yes             |
| row_62 | TMEFF1  | null        | null       | 2219              | 0.260237008       | 0.38725716  | Yes             |
| row_63 | NFE2L3  | null        | null       | 2256              | 0.256974339       | 0.3897257   | Yes             |
| row_64 | BIRC5   | null        | null       | 2305              | 0.251357108       | 0.39154473  | Yes             |
| row_65 | KIF4A   | null        | null       | 2308              | 0.25125137        | 0.3955044   | Yes             |
| row_66 | HESX1   | null        | null       | 2375              | 0.246089384       | 0.39640018  | Yes             |
| row_67 | CRABP2  | null        | null       | 2378              | 0.24569416        | 0.4002702   | Yes             |
| row_68 | GABRA5  | null        | null       | 2541              | 0.234240398       | 0.3965039   | Yes             |
| row_69 | KCNS3   | null        | null       | 2660              | 0.225325122       | 0.39464298  | Yes             |
| row_70 | SNRPA   | null        | null       | 2697              | 0.222264707       | 0.39655164  | Yes             |
| row_71 | WDR12   | null        | null       | 2713              | 0.220593929       | 0.39941135  | Yes             |
| row_72 | NPM3    | null        | null       | 2883              | 0.20950304        | 0.39492002  | Yes             |
| row_73 | CHEK2   | null        | null       | 2912              | 0.207878739       | 0.39696917  | Yes             |
| row_74 | BUB3    | null        | null       | 2985              | 0.203758284       | 0.3969027   | Yes             |
| row_75 | MARS    | null        | null       | 3037              | 0.200757712       | 0.39776585  | Yes             |
| row_76 | KIF5C   | null        | null       | 3123              | 0.195257187       | 0.3969568   | Yes             |
| row_77 | PLCB3   | null        | null       | 3152              | 0.193671033       | 0.39877677  | Yes             |
| row_78 | KPNA2   | null        | null       | 3157              | 0.193485945       | 0.40171152  | Yes             |
| row_79 | NPM1    | null        | null       | 3185              | 0.191731483       | 0.40354678  | Yes             |

**Enrichment of a stem cell signature in H2030-BrM oncospheres.** Transcriptomic changes experienced by H2030-BrM oncospheres that are not represented in H2030-BrM cells when grown

in co-culture conditions with cell-cell contacts with glial cells include the upregulation of the stem cell gene set signature described by Ben Porath et al<sup>43</sup>. The table shows the upregulated genes belonging to the signature.

### Supplementary Table 3.

Supplementary Table 3\_Commonly DEG in radioresistant conditions H2030-BrM in vitro\_Corresponds to Fig.2A

| Gene ID  | 10Gy                       |           |                      |           |                            |           |                                 |           |
|----------|----------------------------|-----------|----------------------|-----------|----------------------------|-----------|---------------------------------|-----------|
|          | Radio-sensitive conditions |           |                      |           | Radio-resistant conditions |           |                                 |           |
|          | Adherent cells             |           | Co-cultures (insert) |           | Oncospheres                |           | Co-cultures (cell-cell contact) |           |
|          | Replica#1                  | Replica#2 | Replica#1            | Replica#2 | Replica#1                  | Replica#2 | Replica#1                       | Replica#2 |
| S100A9   | 7.59439                    | 4.5155    | 28.5228              | 3.64529   | 1580.83                    | 832.755   | 31.5604                         | 42.0916   |
| CITED4   | 7.12601                    | 7.82344   | 8.75282              | 4.26437   | 15.209                     | 13.2526   | 27.4243                         | 26.4535   |
| ADM2     | 1.06844                    | 0.977898  | 2.24177              | 0.69009   | 0.318587                   | 0.518863  | 0.610843                        | 0.609238  |
| SLC1A4   | 13.0187                    | 13.2551   | 23.2088              | 10.885    | 6.15292                    | 5.52887   | 7.13414                         | 10.2621   |
| B7H6     | 1.63611                    | 1.20038   | 2.01825              | 1.4872    | 0.735604                   | 0.462581  | 0.625675                        | 0.963268  |
| ASNS     | 111.828                    | 123.523   | 206.443              | 85.6194   | 38.4651                    | 63.7346   | 63.6966                         | 74.4078   |
| PPP1R15A | 18.4296                    | 20.1114   | 33.8886              | 12.1505   | 10.6333                    | 11.6891   | 12.2159                         | 11.0101   |
| FAT4     | 5.42659                    | 3.90715   | 7.35616              | 4.49208   | 1.1809                     | 0.877306  | 1.41721                         | 1.54036   |
| SESN2    | 4.67358                    | 5.33466   | 16.5771              | 3.37909   | 2.00617                    | 3.8349    | 2.70772                         | 3.44457   |
| MAP1B    | 7.67632                    | 8.15961   | 18.5048              | 9.30292   | 6.61733                    | 2.98472   | 2.96531                         | 3.51404   |

#### Abbreviations

|                                 |        |
|---------------------------------|--------|
| Adherent cells                  | Adh    |
| Co-cultures (insert)            | Insert |
| Oncospheres                     | Onco   |
| Co-cultures (cell-cell contact) | Cocult |

**Commonly DEG in radioresistant conditions H2030-BrM *in vitro*.** A signature showing the commonly upregulated (2) and downregulated (8) genes between radioresistant and radiosensitive conditions. FPKM values are shown for each gene, replica and experimental condition.

### Supplementary Table 4.

Supplementary Table 4\_Radioresistant signature in H2030-BrM in brain organotypic cultures\_Corresponds to Fig.2B

| Gene ID  | Radio-sensitive conditions |           | Radio-resistant conditions |           |
|----------|----------------------------|-----------|----------------------------|-----------|
|          | Adherent cells             |           | Brain slices               |           |
|          | Replica#1                  | Replica#2 | Replica#1                  | Replica#2 |
| S100A9   | 49.8806                    | 30.1378   | 1887.2                     | 2045.53   |
| CITED4   | 24.4308                    | 15.2641   | 43.5374                    | 44.416    |
| ADM2     | 1.2019                     | 0.676868  | 0.598335                   | 0.427862  |
| SLC1A4   | 12.8192                    | 13.0941   | 5.65409                    | 5.50357   |
| ASNS     | 192.069                    | 140.292   | 55.8656                    | 56.816    |
| B7H6     | 0.992509                   | 1.14978   | 0.367122                   | 0.409746  |
| FAT4     | 5.38556                    | 6.71373   | 1.9204                     | 1.79175   |
| PPP1R15A | 26.3816                    | 30.8419   | 19.4836                    | 19.2743   |
| MAP1B    | 2.7817                     | 3.75648   | 2.06515                    | 2.12743   |

**Radioresistant signature in H2030-BrM in brain organotypic cultures.** The radio-resistance

signature is represented in H2030-BrM cells growing in organotypic cultures. FPKM values are shown for each gene, replica and experimental condition.

## Supplementary Table 5.

Supplementary Table 5\_Top 25 upregulated genes in H2030-BrM in brain organotypic cultures

FDR=0.05

| Name       | baseMean    | log2FoldChange | lfcSE     | stat        | pvalue      | padj        |
|------------|-------------|----------------|-----------|-------------|-------------|-------------|
| S100A9     | 17667.64142 | 4.345221815    | 0.2871146 | 15.13410111 | 9.64901E-52 | 3.86829E-49 |
| S100A8     | 132.8617673 | 3.957446968    | 0.2811576 | 14.07554643 | 5.36883E-45 | 1.36658E-42 |
| FAM83A     | 318.3020428 | 3.120515852    | 0.1859135 | 16.78477409 | 3.15427E-63 | 1.94546E-60 |
| S100A4     | 716.0791138 | 2.927415658    | 0.1383012 | 21.16695316 | 1.9261E-99  | 4.41252E-96 |
| SPNS2      | 137.6005157 | 2.91168495     | 0.2470245 | 11.78703023 | 4.55315E-32 | 4.32037E-30 |
| PLP1       | 37.03272467 | 2.833083114    | 0.3424643 | 8.272638718 | 1.31026E-16 | 3.2226E-15  |
| KIF5A      | 38.35076374 | 2.550084349    | 0.3421988 | 7.452055155 | 9.18973E-14 | 1.5966E-12  |
| TMEM132B   | 59.56452267 | 2.490892934    | 0.3085066 | 8.074033979 | 6.80129E-16 | 1.56031E-14 |
| CLDN4      | 125.2852834 | 2.440134849    | 0.2484883 | 9.819920129 | 9.24167E-23 | 4.32068E-21 |
| ITGA10     | 215.6828891 | 2.435036971    | 0.2025878 | 12.01966465 | 2.80106E-33 | 2.87935E-31 |
| NACAD      | 90.36572445 | 2.223636054    | 0.2682053 | 8.290797446 | 1.12492E-16 | 2.78382E-15 |
| GBP2       | 93.26812085 | 2.221095795    | 0.2665493 | 8.332777828 | 7.89673E-17 | 1.98483E-15 |
| MILR1      | 53.75359509 | 2.204661121    | 0.3114474 | 7.078759352 | 1.45451E-12 | 2.15967E-11 |
| ALDH3A1    | 26.1311218  | 2.191499188    | 0.3478726 | 6.299717318 | 2.98189E-10 | 3.24187E-09 |
| SHC2       | 147.2399142 | 2.189553474    | 0.2264569 | 9.668742929 | 4.09375E-22 | 1.79365E-20 |
| DLL4       | 277.501276  | 2.177090104    | 0.1797622 | 12.11094752 | 9.24203E-34 | 9.88035E-32 |
| ZNF295-AS1 | 53.91570455 | 2.094110378    | 0.3093444 | 6.769511546 | 1.29218E-11 | 1.69569E-10 |
| TNFRSF19   | 259.3403404 | 2.063482861    | 0.1873033 | 11.01680075 | 3.17131E-28 | 2.29077E-26 |
| ZNF467     | 918.9162207 | 2.01200798     | 0.1162718 | 17.3043549  | 4.36139E-67 | 4.3712E-64  |
| AC068768.1 | 117.7816076 | 1.989998679    | 0.2436273 | 8.168209465 | 3.13E-16    | 7.41399E-15 |
| SUSD2      | 806.1718396 | 1.982671353    | 0.2853347 | 6.948582267 | 3.68975E-12 | 5.21312E-11 |
| LINC01801  | 74.59836121 | 1.902725079    | 0.2822235 | 6.741909134 | 1.56319E-11 | 2.03138E-10 |
| FAM107B    | 5171.896475 | 1.90223444     | 0.0818393 | 23.24353298 | 1.6538E-119 | 6.6299E-116 |
| LURAP1L    | 95.69413398 | 1.892097179    | 0.2586377 | 7.315628925 | 2.56179E-13 | 4.21774E-12 |
| THRB       | 256.3074852 | 1.854725726    | 0.181294  | 10.23048867 | 1.44787E-24 | 7.68809E-23 |

**Top 25 upregulated genes in H2030-BrM in brain organotypic cultures.** Top 25 upregulated genes in H2030-BrM cells cultured on brain organotypic cultures compared to *in vitro* cultured conditions. DESeq2 was used to identify differentially expressed genes between two groups of samples based on a negative binomial distribution model. Values in the table represent normalized base mean expression level, Log2 fold change, shrinkage of effect size (lfcSE), Wald statistic, Wald test p-value and adjusted p-value below a given FDR cutoff, alpha = 0.05.

## Supplementary Table 6.

**Supplementary Table 6** Enrichment of NF- $\kappa$ B signatures in radioresistant conditions\_Corresponds to Fig.S2H

NFKB signature\_In vitro\_REACTOME\_MAP\_KINASE\_ACTIVATION\_IN\_TLR\_CASCADE

Signature evaluated DEG H2030-BrM resistant (Onc-Cocult) vs sensitive (Adh-Insert) surrogates irradiated (10Gy)

| NAME   | GENE SYMBOL | RANK IN GENE LIST | RANK METRIC SCORE | RUNNING ES  | CORE ENRICHMENT |
|--------|-------------|-------------------|-------------------|-------------|-----------------|
| row_0  | DUSP6       | 57                | 1.055718184       | 0.017773056 | Yes             |
| row_1  | FOS         | 236               | 0.597747922       | 0.029952288 | Yes             |
| row_2  | MAP2K1      | 293               | 0.541081727       | 0.047771573 | Yes             |
| row_3  | PPP2R1B     | 673               | 0.368947476       | 0.050658587 | Yes             |
| row_4  | MAPK7       | 910               | 0.319571048       | 0.060156483 | Yes             |
| row_5  | MAP2K3      | 1201              | 0.279324442       | 0.06715796  | Yes             |
| row_6  | DUSP7       | 1239              | 0.273496807       | 0.08585562  | Yes             |
| row_7  | TAB1        | 1545              | 0.240439445       | 0.092163645 | Yes             |
| row_8  | CDK1        | 1622              | 0.234001532       | 0.10905833  | Yes             |
| row_9  | PPP2R1A     | 1651              | 0.232045755       | 0.12817205  | Yes             |
| row_10 | RPS6KA1     | 2289              | 0.187860012       | 0.119131744 | Yes             |
| row_11 | MAPK3       | 2313              | 0.186190441       | 0.13847661  | Yes             |
| row_12 | MAP2K6      | 2415              | 0.180324972       | 0.15421556  | Yes             |
| row_13 | MAPKAPK3    | 3437              | 0.130279168       | 0.12742294  | Yes             |
| row_14 | MAP2K4      | 3862              | 0.113285482       | 0.1282296   | Yes             |
| row_15 | DUSP3       | 3978              | 0.108269811       | 0.14332132  | Yes             |
| row_16 | PPP2CA      | 4288              | 0.096997254       | 0.14944443  | Yes             |
| row_17 | ELK1        | 5069              | 0.072650999       | 0.13379323  | Yes             |
| row_18 | RIPK2       | 5210              | 0.068864122       | 0.14772922  | Yes             |
| row_19 | DUSP4       | 5308              | 0.066248477       | 0.16365308  | Yes             |
| row_20 | MAPKAPK2    | 5846              | 0.051812474       | 0.15923575  | Yes             |
| row_21 | MAP2K7      | 5911              | 0.050377205       | 0.1766852   | Yes             |
| row_22 | PPP2R5D     | 5977              | 0.048563723       | 0.19408841  | Yes             |
| row_23 | MAP3K7      | 6139              | 0.045003496       | 0.20705356  | Yes             |
| row_24 | IRAK1       | 6338              | 0.040299404       | 0.21830818  | Yes             |
| row_25 | CREB1       | 6693              | 0.032273497       | 0.22235096  | Yes             |

NFKB signature\_Ex vivo\_REACTOME\_MAP\_KINASE\_ACTIVATION\_IN\_TLR\_CASCADE

Signature evaluated DEG H2030-BrM in brain slices vs H2030-BrM in vitro (Adh)

| NAME   | GENE SYMBOL | RANK IN GENE LIST | RANK METRIC SCORE | RUNNING ES  | CORE ENRICHMENT |
|--------|-------------|-------------------|-------------------|-------------|-----------------|
| row_0  | DUSP6       | 183               | 1.141023278       | 0.014733569 | Yes             |
| row_1  | MAPK7       | 240               | 1.068263173       | 0.033405244 | Yes             |
| row_2  | MAP2K6      | 304               | 0.987556219       | 0.051859856 | Yes             |
| row_3  | ATF2        | 330               | 0.967172086       | 0.071492806 | Yes             |
| row_4  | ELK1        | 429               | 0.898986399       | 0.08886211  | Yes             |
| row_5  | DUSP3       | 576               | 0.826986849       | 0.104743004 | Yes             |
| row_6  | TAB3        | 809               | 0.74672997        | 0.117957145 | Yes             |
| row_7  | MAPK11      | 1177              | 0.651373148       | 0.1269851   | Yes             |
| row_8  | IRAK2       | 1527              | 0.584053278       | 0.13657123  | Yes             |
| row_9  | MAPKAPK2    | 1705              | 0.556251705       | 0.15149085  | Yes             |
| row_10 | MEF2A       | 1950              | 0.520993769       | 0.16433288  | Yes             |
| row_11 | CREB1       | 2277              | 0.478613585       | 0.1746322   | Yes             |
| row_12 | MAP2K4      | 2421              | 0.461385131       | 0.19060613  | Yes             |
| row_13 | TAB2        | 2573              | 0.446571827       | 0.20633197  | Yes             |
| row_14 | FOS         | 2654              | 0.437566936       | 0.22425944  | Yes             |
| row_15 | MAPK3       | 2657              | 0.437408179       | 0.24460559  | Yes             |
| row_16 | MAP2K3      | 3009              | 0.399760306       | 0.25412968  | Yes             |
| row_17 | RIPK2       | 3426              | 0.363707274       | 0.26163822  | Yes             |
| row_18 | IRAK1       | 3437              | 0.362179995       | 0.2817363   | Yes             |
| row_19 | DUSP4       | 3566              | 0.352443099       | 0.29817536  | Yes             |
| row_20 | MAP3K7      | 3665              | 0.344691396       | 0.31554466  | Yes             |
| row_21 | MEF2C       | 4414              | 0.288518876       | 0.3127583   | Yes             |
| row_22 | MAP2K2      | 4825              | 0.262437075       | 0.3204529   | Yes             |
| row_23 | RPS6KA2     | 5474              | 0.223521724       | 0.3207674   | Yes             |
| row_24 | TRAF6       | 6166              | 0.190309897       | 0.31974855  | Yes             |
| row_25 | PPP2R1A     | 6265              | 0.184291035       | 0.33711788  | Yes             |
| row_26 | DUSP7       | 6687              | 0.16543071        | 0.34447137  | Yes             |
| row_27 | TAB1        | 6893              | 0.159416139       | 0.35852274  | Yes             |
| row_28 | MAPK1       | 8555              | 0.099293478       | 0.32742542  | Yes             |
| row_29 | MAPK14      | 8560              | 0.099059172       | 0.34770957  | Yes             |
| row_30 | MAPK8       | 8569              | 0.098485753       | 0.36786965  | Yes             |
| row_31 | MAPK9       | 8630              | 0.096635945       | 0.3864173   | Yes             |

**Enrichment of NF- $\kappa$ B signatures in radioresistant conditions.** Genes set enrichment analysis performed in radioresistant conditions both *in vitro* (upper table) and *ex vivo* (lower table) showed

gene signatures related to NF- $\kappa$ B. Components of the pathway represented in each experimental condition are shown.









cluster. Differentially expressed genes between the two groups of cells were identified using a non-parametric Wilcoxon Rank Sum test (Seurat default). Pct.1 corresponds to the fraction of cells in column "cluster" in the table, and pct.2 corresponds to the rest of cells in the other clusters/identities. The 'avg\_logFC' column is giving the difference found in that gene in that cluster/identity compared to the rest. If the number is positive, it means that is upregulated, and if it is negative, it is downregulated. P\_val\_adj, adjusted p-value, based on Bonferroni correction using all features in the dataset.

**Supplementary Table 8.**

**Top 2000 genes with high variable cell-to-cell expression in H2030-BrM brain metastasis.**

Subset of genes that exhibit high cell-to-cell variation in the dataset (i.e., genes with high expression in some cells and low expression in others), obtained after modeling the mean-variance relationship inherent in single-cell data with Seurat. Top 10 genes are in bold.



of cells with respect to all others for each obtained cluster. Differentially expressed genes between the two groups of cells were identified using a non-parametric Wilcoxon Rank Sum test (Seurat default). Pct.1 corresponds to the fraction of cells in column "cluster" in the table, and pct.2 corresponds to the rest of cells in the other clusters/identities. The 'avg\_logFC' column is giving the difference found in that gene in that cluster/identity compared to the rest. If the number is positive, it means that is upregulated, and if it is negative, it is downregulated. P\_val\_adj, adjusted p-value, based on Bonferroni correction using all features in the dataset.

### Supplementary Table 10.

Supplementary Table 10\_GSEA top 25 in cluster 5 from H2030-BrM brain metastasis scRNAseq\_Corresponds to Fig. 4E

| ID  | Pathway                                                      | NES       | Nominal p-value | FDR q-value |
|-----|--------------------------------------------------------------|-----------|-----------------|-------------|
| #1  | MALLMIR_CIP_TARGETS                                          | 2.1856139 | 0               | 0           |
| #2  | MALLMIR_CIM_CROCFOPONE                                       | 2.077059  | 0               | 0           |
| #3  | MALLMIR_MIC_TARGETS_V2                                       | 2.055294  | 0               | 0           |
| #4  | REACTOMR_CELL_CYCLE_CHECKPOINTS                              | 1.8397183 | 0               | 0.20651927  |
| #5  | KNOWING_EMBRYONIC_STEM_CELL_CORE                             | 1.8382819 | 0               | 0.001       |
| #6  | REACTOME_H2O_CITRATES_ACTIVATE_NADPH_OXIDASES                | 1.809974  | 0               | 0.15853398  |
| #7  | REACTOME_ACTIVATION_OF_THE_PME_REPLICATIVE_COMPLEX           | 1.8082675 | 0               | 0.13882651  |
| #8  | REACTOME_DNA_REPLICATION_PIE_INITIATION                      | 1.807574  | 0               | 0.10276653  |
| #9  | PD_TOLL_ENDOGENOUS_PATHWAY                                   | 1.7938244 | 0.00247248      | 0.10997929  |
| #10 | REACTOME_DNA_REPLICATION                                     | 1.7920991 | 0               | 0.09132979  |
| #11 | REACTOME_DISEASES_OF_IMMUNE_SYSTEM                           | 1.7911379 | 0               | 0.08391404  |
| #12 | REACTOME_DNA_REPLICATION_TERMINATION                         | 1.7898511 | 0               | 0.050550236 |
| #13 | PD_ATR_PATHWAY                                               | 1.7769037 | 0.002512563     | 0           |
| #14 | REACTOME_SEPARATION_OF_SISTER_CHROMATIDS                     | 1.7747786 | 0               | 0.09129486  |
| #15 | REACTOME_H2O_CITRASE_EFFECTORS                               | 1.7702826 | 0               | 0.091704375 |
| #16 | REACTOME_REGULATION_OF_TIR_BY_ENDOGENOUS_LIGAND              | 1.7702146 | 0               | 0.07620489  |
| #17 | REACTOME_BRAK_DEFICIENCY_TAD_2                               | 1.7524831 | 0               | 0.09424279  |
| #18 | REACTOME_METABOLISM_OF_PICRYLAMINES                          | 1.7471399 | 0.002487562     | 0.09466137  |
| #19 | REACTOME_DISEASE_CHECKPOINTS                                 | 1.7466846 | 0               | 0.08232875  |
| #20 | PD_AURORA_B_PATHWAY                                          | 1.7382776 | 0               | 0.09463558  |
| #21 | MALLMIR_MIC_TARGETS_V2                                       | 1.7350991 | 0               | 0.003878956 |
| #22 | REACTOME_DNA_STRAND_ELONGATION                               | 1.7271185 | 0.00244888      | 0.10490633  |
| #23 | MALLMIR_CIP_TARGETS                                          | 1.7228379 | 0               | 0.004249314 |
| #24 | ECG_PROLIFERATION                                            | 1.7186202 | 0.00244888      | 0.114497086 |
| #25 | REACTOME_ACTIVATION_OF_ATR_IN_RESPONSE_TO_REPLICATION_STRESS | 1.7185838 | 0               | 0.108565256 |

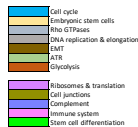

| ID  | Pathway                                                                           | NES        | Nominal p-value | FDR q-value |
|-----|-----------------------------------------------------------------------------------|------------|-----------------|-------------|
| #1  | REACTOME_NUCLEAR_EVENTS_KINASE_AND_TRANSCRIPTION_FACTOR_ACTIVATION                | -1.5647209 | 0.00668145      | 0.24929775  |
| #2  | REACTOME_EUKARYOTIC_TRANSLATION_INITIATION                                        | -1.56283   | 0.001444737     | 0.25121368  |
| #3  | REACTOME_TONE_FUNCTION_INTERACTIONS                                               | -1.5609314 | 0.00646445      | 0.2013162   |
| #4  | REACTOME_RESPONSE_OF_EF_ZAKA_GCN2_TO_AMINO_ACID_DEFICIENCY                        | -1.573488  | 0               | 0.2012362   |
| #5  | NP_SLEEP_REGULATOR                                                                | -1.5747778 | 0.00166375      | 0.20749551  |
| #6  | REACTOME_CELL_ADHESION_MOLECULES_CAMS                                             | -1.577083  | 0               | 0.21110092  |
| #7  | PD_LIG_TO_DOWNSTREAM_PATHWAY                                                      | -1.5795236 | 0.0088841       | 0.21413146  |
| #8  | REACTOME_NONSENSE_MEDIATED_DECAY_NMD                                              | -1.591155  | 0.001577287     | 0.14895424  |
| #9  | REACTOME_COMPLEMENT_CASCADE                                                       | -1.6243877 | 0.00622517      | 0.08970343  |
| #10 | REACTOME_ANTIGEN_PRESENTATION_FOLDING_ASSEMBLY_AND_PEPTIDE_LOADING_OF_CLASS_I_MHC | -1.620489  | 0               | 0.0996695   |
| #11 | REACTOME_SELENOAMINO_ACID_METABOLISM                                              | -1.676544  | 0               | 0.028492492 |
| #12 | REACTOME_GFP_DEPENDENT_COTRANSLATIONAL_PROTEIN_TARGETING_TO_MEMBRANE              | -1.700441  | 0               | 0.01425332  |
| #13 | REACTOME_CELL_CYCLE_CELL_DIFFERENTIATION                                          | -1.7051486 | 0               | 0.01374876  |
| #14 | REACTOME_FIBROSIS                                                                 | -1.7070721 | 0               | 0.01423884  |
| #15 | REGG_ALLOGRAFT_REJECTION                                                          | -1.7070721 | 0               | 0.14591277  |
| #16 | REGG_GRAFT_VERSUS_HOST_DISEASE                                                    | -1.721322  | 0               | 0.013642061 |
| #17 | REGG_AUTODOMINE_THYROID_DISEASE                                                   | -1.7374891 | 0               | 0.020454046 |
| #18 | REACTOME_EUKARYOTIC_TRANSLATION_ELONGATION                                        | -1.7466489 | 0               | 0.006701518 |
| #19 | EPICYTOSKEL_SKEGOMAL_PROTEINS                                                     | -1.7618171 | 0               | 0.05643153  |
| #20 | REACTOME_MMUNOREGULATORY_INTERACTIONS_BETWEEN_A_LYMPHOID_AND_A_NON_LYMPHOID       | -1.8271065 | 0               | 8.07E-04    |

GSEA in Cluster 5 as defined by scRNAseq in H2030-BrM brain metastasis. The GSEAPreranked module was used to conduct gene set enrichment analysis on a pre-ranked gene list. GSEAPreranked calculates an enrichment score for each gene set. A gene set's enrichment score reflects how often members of that gene set occur at the top or bottom of the ranked data set. Top 15 signatures up or down according to NES (FDR q value <0.25 and nominal p-value <0.01) in cluster 5.



S100A9. DESeq2 was used to identify differentially expressed genes between two groups of samples based on a negative binomial distribution model. Values in the table represent normalized base mean expression level, Log2 fold change, shrinkage of effect size (lfcSE), Wald statistic, Wald test p-value and adjusted p-value below a given FDR cutoff, alpha = 0.05. Those upregulated were evaluated among *in vitro* and *ex vivo* surrogates of radio-resistance. In these preparations Cuffdiff (Cufflinks 2.2.1) was used to identify differentially expressed genes between two groups of samples based on the beta negative binomial distribution. The estimated significance level (P value) was corrected to account for multiple hypotheses testing using a Benjamin and Hochberg False Discovery Rate (FDR) adjustment.

## Supplementary Table 12.

**Supplementary Table 12**\_Identification of specific NF- $\kappa$ B targets in radioresistant conditions\_Corresponds to Fig. 4R

Specific components of the signature hallmark\_TNFA\_signaling\_via\_NFKB identified among significantly (P-adjust < 0.05) upregulated genes in both *in vitro* and *ex vivo* radio-resistant conditions

**GENE SYMBOL**

CEBPB

DUSP5

FOS

HES1

JUNB

NR4A2

SAT1

SNN

TNC

**Identification of specific NF- $\kappa$ B targets in radioresistant conditions.** Individual genes of the NF- $\kappa$ B hallmark signature significantly upregulated in both *in vitro* and *ex vivo* radio-resistant conditions are shown.











**Supplementary Table 19.**

Supplementary Table 19. Cohort of human glioblastomas to estimate the prognostic value of *S100A9* to radiotherapy. Both TCGA and CGGA cohorts were used to evaluate the correlation between *S100A9* gene expression and overall survival (OS) from glioblastoma diagnosis.

**Cohort of human glioblastomas to estimate the prognostic value of *S100A9* to radiotherapy.**  
 Both TCGA and CGGA cohorts were used to evaluate the correlation between *S100A9* gene expression and overall survival (OS) from glioblastoma diagnosis.



**Supplementary Table 20.**



**Cohorts of human primary breast and lung cancers to estimate the prognostic value of**

**S100A9 to radiotherapy.** TCGA data on primary breast and lung cancer was filtered by the presence of WBRT and levels of S100A9 evaluated for any clinical correlation.

**Supplementary Table 21.**

Supplementary Table 21. Cohort of 71 human brain metastases with available blood liquid biopsies. Corresponds to Fig.6I-K and Fig.S6I-J

**Cohort of 71 human brain metastases with available blood liquid biopsy.** Blood liquid biopsies from three independent institutions were collected and evaluated for S100A9 circulating levels using ELISA. Samples were obtained from patients with brain metastasis that received or not WBRT. The correlation of S100A9 levels with overall survival (OS) from brain metastasis diagnosis was later evaluated. N/A: data not available.

**Supplementary Table 22.**

Supplementary Table 22. Human brain metastases processed as patient-derived organotypic cultures (PDOC). Corresponds to Fig.6I-K and Fig.S6I-O

| Sample | ID         | hBM     | H120 ID      | Gender | Birthdate | KPS | 2nd surgery | Experiment | Primary tumor | S100A9 IF score | Date of 1st brain met surgery | Date of 1st brain met radiation | Date of relapsed brain met surgery |
|--------|------------|---------|--------------|--------|-----------|-----|-------------|------------|---------------|-----------------|-------------------------------|---------------------------------|------------------------------------|
| #1     | Patient #1 | hBM#M41 | 17-37637     | Man    | 68yrs     | 60  |             | PDOC       | Lung          | Negative (0)    | 04/12/2017                    | Unknown                         | No relapse                         |
| #2     | Patient #2 | hBM#M62 | 20-2342      | Man    | 59yrs     | 60  |             | PDOC       | Lung          | Positive (3)    | N/A/07/2019                   | 30/07/2019                      | 24/03/2020                         |
| #3     | Patient #3 | hBM#M67 | B20-15783    | Man    | 59yrs     | 80  |             | PDOC       | Lung          | Positive (1)    |                               | 04/12/2020                      | 24/07/2020                         |
| #4     | Patient #4 | hBM#M69 | 20-16600     | Man    | 56yrs     | 80  |             | PDOC       | Lung          | Positive (1)    | Unknown                       | Unknown                         | 05/08/2020                         |
| #5     | Patient #5 | hBM#M79 | B-20-26624-D | Woman  | 39yrs     | 80  |             | PDOC       | Breast        | Positive (1)    | 04/04/2019                    | 25/02/2019                      | 16/12/2020                         |
| #6     | Patient #6 | hBM#M65 | 18-9830      | Man    | 67yrs     | 80  |             | PDOC       | Lung          | Positive (2)    | Unknown                       | Unknown                         | 12/03/2018                         |
| #8     | Patient #7 | hBM#M89 | B-21-5970    | Woman  |           |     |             | PDOC       | Breast        | Positive (1)    |                               |                                 | 11.03.2021                         |
| #9     | Patient #8 | hBM#M98 | B-21-12482   | Woman  |           |     |             | PDOC       | Breast        | Positive (1)    |                               |                                 | 19.05.2021                         |

**Human brain metastases processed as patient-derived organotypic cultures (PDOC).** 8 PDOC established from brain metastasis were evaluated for S100A9 levels by

immunofluorescence and for their response to radiotherapy and FPS-ZM1. Samples from patients #2 to #8 correspond to relapsed metastases that received previous radiotherapy.

### Supplementary Table 23.

Supplementary Table 23\_Assessment of general health status in tumor free mice one month after completing the treatment with irradiation alone or with FPS-ZM1

| Mice tag                              | Irradiated + vehicle |    |    |    |    | Irradiated + FPS-ZM1 |             |             |             |             | Note                                                                       |
|---------------------------------------|----------------------|----|----|----|----|----------------------|-------------|-------------|-------------|-------------|----------------------------------------------------------------------------|
|                                       | #1                   | #2 | #3 | #4 | #5 | #6                   | #7          | #8          | #9          | #10         |                                                                            |
| Skin                                  | 0                    | 0  | 0  | 0  | 0  | 0                    | 0           | 0           | 0           | 0           |                                                                            |
| Fur                                   | 0                    | 0  | 0  | 0  | 0  | 0                    | 0           | 0           | 0           | 0           | Presence of white hair in the head (not present pre-treatment) of all mice |
| Whiskers                              | 0                    | 0  | 0  | 0  | 0  | 0                    | 0           | 0           | 0           | 0           |                                                                            |
| Eyes                                  | 0                    | 0  | 0  | 0  | 0  | 0                    | 0           | 0           | 0           | 0           |                                                                            |
| Movement_regular                      | 0                    | 0  | 0  | 0  | 0  | 0                    | 0           | 0           | 0           | 0           |                                                                            |
| Movement_circles                      | 0                    | 0  | 0  | 0  | 0  | 0                    | 0           | 0           | 0           | 0           |                                                                            |
| Movement_Unstable                     | 0                    | 0  | 0  | 0  | 0  | 0                    | 0           | 0           | 0           | 0           |                                                                            |
| Movement_Other alterations            | 0                    | 0  | 0  | 0  | 0  | 0                    | 0           | 0           | 0           | 0           |                                                                            |
| Aggressive response post-manipulation | 0                    | 0  | 0  | 0  | 0  | 0                    | 0           | 0           | 0           | 0           |                                                                            |
| Any other aspect                      | 0                    | 0  | 0  | 0  | 0  | More active          | More active | More active | More active | More active |                                                                            |

0: no alteration/ 1: alteration

Assessment of general health status in tumor free mice one month after completing the treatment with irradiation alone or with FPS-ZM1. Results from health status evaluation of two cohorts of mice, one irradiated and treated with a vehicle and the other also irradiated but receiving FPS-ZM1.

### Supplementary Table 24.

Supplementary Table 24\_Significant P values of behavioral tests

| Behavioral Test                                        | Statistical Test             | Significant effect of Test (P12, P10=123,855, p=1.8, BSE 24)                   | Significant effect of treatment (P13, N30=901,489, p=2.4E-20) | Significant effect of FPS-ZM1 (P14, N30=901,489, p=2.4E-20) |
|--------------------------------------------------------|------------------------------|--------------------------------------------------------------------------------|---------------------------------------------------------------|-------------------------------------------------------------|
| Contextual Fear Conditioning (Extended Data Figure 6g) | Pairwise Comparisons (Sidak) | Acquisition/Short Term Memory                                                  | Control (p=0.0002)                                            | Irradiation (p=1.18E-20)                                    |
|                                                        | Pairwise Comparisons (Sidak) | Short Term Memory/Context Change                                               | Control (p=0.0002)                                            | Irradiation+FPS-ZM1 (p=1.58E-19)                            |
| Inverted Plus Maze (Extended Data Fig. 6h)             | Two-way ANOVA                | Control (p=1E-08), Irradiation (p=1.58E-07), Irradiation+FPS-ZM1 (p=6.000E-08) | Significant effect of test (P13, N30=901,489, p=2.4E-20)      | Control (p=0.0002)                                          |
|                                                        | Pairwise Comparisons (Sidak) |                                                                                |                                                               | Irradiation (p=1.18E-20)                                    |
| Morris Water Maze (Fig. 6h)                            | Two-way ANOVA                | Control (p=1E-08), Irradiation (p=1.58E-07), Irradiation+FPS-ZM1 (p=6.000E-08) | Significant effect of test (P13, N30=901,489, p=2.4E-20)      | Control (p=0.0002)                                          |
|                                                        | Pairwise Comparisons (Sidak) |                                                                                |                                                               | Irradiation (p=1.18E-20)                                    |
| Pattern Separation (Supplementary Fig. 6r)             | Two-way ANOVA                | Control (p=1E-08), Irradiation (p=1.58E-07), Irradiation+FPS-ZM1 (p=6.000E-08) | Significant effect of test (P13, N30=901,489, p=2.4E-20)      | Control (p=0.0002)                                          |
|                                                        | Pairwise Comparisons (Sidak) |                                                                                |                                                               | Irradiation (p=1.18E-20)                                    |
| Novel Object Recognition (Supplementary Fig. 6q)       | Two-way ANOVA                | Control (p=1E-08), Irradiation (p=1.58E-07), Irradiation+FPS-ZM1 (p=6.000E-08) | Significant effect of test (P13, N30=901,489, p=2.4E-20)      | Control (p=0.0002)                                          |
|                                                        | Pairwise Comparisons (Sidak) |                                                                                |                                                               | Irradiation (p=1.18E-20)                                    |

Significant P values of behavioral tests. This table reflects statistical tests applied to Fig. 6h, Extended Data Figure 6f-g, Supplementary Figure 6q-r and their results. Only those reaching statistical significance are shown.



RENACER:

Cecilia Sobrino<sup>39</sup>, Nuria Ajenjo<sup>39</sup>, Maria-Jesus Artiga<sup>39</sup>, Eva Ortega-Paino<sup>39</sup>, Patricia Baena<sup>2</sup>, Juan Manuel Sepúlveda<sup>3</sup>, Ángel Pérez-Núñez<sup>4,5</sup>, Jose Fernández-Alén<sup>6</sup>, Manuel Valiente<sup>2</sup>.

<sup>39</sup>Biobank; CNIO; Madrid, 28029; Spain.

<sup>2</sup>Brain Metastasis Group, CNIO; Madrid, 28029, Spain.

<sup>3</sup>Neuro-Oncology Unit, Hospital Universitario 12 de Octubre; Madrid, 28041, Spain.

<sup>4</sup>Neurosurgery Unit, Hospital Universitario 12 de Octubre; Madrid, 28041, Spain.

<sup>5</sup>Department of Surgery, Universidad Complutense de Madrid, Madrid, 28040; Spain.

<sup>6</sup>Department of Neurosurgery, Hospital Universitario de La Princesa; Madrid, 28006, Spain.
